## RET Ligands Mediate Endocrine Sensitivity via a Bi-stable Feedback Loop with ER $\alpha$

Sachi Horibata,<sup>1,2</sup> Edward J. Rice,<sup>1</sup> Hui Zheng,<sup>1</sup> Lynne J. Anguish,<sup>1</sup> Chinatsu Mukai,<sup>1</sup> Brooke A. Marks,<sup>1</sup> Tinyi Chu,<sup>1,3</sup> Scott A. Coonrod,<sup>1,4,\*</sup> and Charles G. Danko<sup>1,4,5\*</sup>

<sup>1</sup>Baker Institute for Animal Health, College of Veterinary Medicine, Cornell University, Ithaca, NY 14853, USA

<sup>2</sup>Department of Molecular Medicine, College of Veterinary Medicine, Cornell University, Ithaca, NY 14853, USA

<sup>3</sup>Graduate Field of Computational Biology, Cornell University, Ithaca, NY 14853, USA

<sup>4</sup>Department of Biomedical Sciences, College of Veterinary Medicine, Cornell University, Ithaca, NY 14853, USA

<sup>5</sup>Lead Contact

\*Correspondence: [sac269@cornell.edu](mailto:sac269@cornell.edu) (S.A.C.), [dankoc@gmail.com](mailto:dankoc@gmail.com) (C.G.D.)

## 1 **Summary**

2 The molecular mechanisms of endocrine resistance in breast cancer remain poorly understood.  
3 Here we used PRO-seq to map the location of hundreds of genes and thousands of distal  
4 enhancers whose transcriptional activities differ between endocrine sensitive and resistant  
5 MCF-7 cells. Our genome-wide screen discovered increased transcription of the glial-cell line  
6 derived neurotrophic factor (GDNF), a RET tyrosine kinase receptor ligand, which we validate  
7 as both necessary and sufficient for resistance in MCF-7 cells. GDNF caused endocrine  
8 resistance by switching the active state of a bi-stable feedback loop in the MCF-7 regulatory  
9 network from ER $\alpha$  signaling to GDNF-RET signaling. To cause this switch, GDNF  
10 downregulated ER $\alpha$  transcription and activated the transcription factor EGR1, which, in turn,  
11 induced GDNF. Remarkably, both MCF-7 cells and ER+ primary tumors appear poised for  
12 endocrine resistance via the RET signaling pathway, but lack robust RET ligand expression and  
13 only develop resistance upon expression of GDNF or other RET ligands.

## 14 **Highlights**

- 15 • GDNF expression promotes endocrine resistance in MCF-7 cells.
- 16 • ER+ MCF-7 cells are poised for RET-mediated endocrine resistance, but lack  
17 expression of RET ligands.
- 18 • RET ligand expression predicts resistance to the aromatase inhibitor letrozole.
- 19 • GDNF regulatory network directly down-regulates ER $\alpha$  and indirectly up-regulates *GDNF*.

## 20 Introduction

21 Estrogen receptor alpha (ER $\alpha$ ) is the major driver of ~75% of all breast cancers. ER $\alpha$  is  
22 a transcription factor whose genomic actions are induced upon binding its cognate ligand, 17 $\beta$ -  
23 estradiol (E2). E2-liganded ER $\alpha$  activates and represses thousands of ER $\alpha$  target genes and  
24 non-coding RNAs (Carroll et al., 2006; Hah et al., 2011, 2013). Genes whose transcription is  
25 directly activated by ER $\alpha$  promote a mitogenic response in breast cancer cells, resulting in entry  
26 into the cell cycle, survival, and continued cell proliferation (Planas-Silva and Weinberg, 1997;  
27 Prall et al., 1998). Current therapies for patients with ER+ breast cancer are largely aimed at  
28 blocking the ER $\alpha$  signaling pathway. For example, tamoxifen blocks ER $\alpha$  function by  
29 competitively inhibiting E2/ER $\alpha$  interactions (Shiau et al., 1998) and fulvestraut promotes  
30 ubiquitin-mediated degradation of ER $\alpha$  (Wakeling, 2000). Because ER $\alpha$  is such an important  
31 and pervasive breast cancer driver, endocrine therapies are estimated to have reduced breast  
32 cancer mortality by 25-30% (Early Breast Cancer Trialists' Collaborative, 2005; Emens and  
33 Davidson, 2009; Musgrove and Sutherland, 2009).

34 Despite the widespread success of endocrine therapies, approximately 40-50% of breast  
35 cancer patients will either present with endocrine resistant breast cancer at the time of diagnosis  
36 or progress into endocrine-resistant breast cancer during the course of treatment (Ma et al.,  
37 2009). Numerous studies have now identified growth factor signal transduction “escape  
38 pathways” that may provide mechanisms for cell growth and survival that are independent of E2.  
39 For example, increased signaling from the EGFR/HER2 (Benz et al., 1992), RET tyrosine  
40 kinase receptor signaling (Gattelli et al., 2013; Morandi et al., 2013; Plaza-Menacho et al., 2010),  
41 and IGFR (Chan et al., 2016) have each been associated with either experimental or clinical  
42 endocrine resistance. Importantly, novel therapies targeting these tyrosine kinase signaling  
43 pathways are now showing promise in phase 2 trials for certain cohorts of patients (Park et al.,  
44 2016), raising substantial interest in further deciphering the mechanisms by which anti-tyrosine  
45 kinase receptor therapies are acting to inhibit breast cancer cell growth. A better understanding

46 of the transcriptional targets of these signaling pathways as well as understanding how these  
47 pathways crosstalk with ER $\alpha$  signaling will likely aid in the development of new predictive  
48 biomarkers and new targets for therapeutic intervention.

49 Dissecting the transcriptional mechanisms underlying endocrine resistance has proven  
50 technically challenging owing to the large number of indirect target genes and complex nature of  
51 each growth factor escape pathway. An emerging strategy for dissecting transcriptional  
52 responses to stimuli involves measuring gene transcription at the level of nascent RNA  
53 production (Churchman and Weissman, 2011; Core et al., 2008; Mahat et al., 2016a; Nojima et  
54 al., 2015; Schwalb et al., 2016). These approaches are highly sensitive to immediate and  
55 transient transcriptional responses to stimuli, allowing the discovery of target genes within  
56 minutes of activation and hence distinguishing primary and secondary effects (Arner et al.,  
57 2015; Danko et al., 2013; Duarte et al., 2016; Hah et al., 2011; Mahat et al., 2016b). Moreover,  
58 these approaches can detect active transcriptional regulatory elements (TREs), including both  
59 promoters and distal enhancers, because these elements display distinctive patterns of  
60 transcription (Andersson et al., 2014a; Core et al., 2014; Danko et al., 2015; Hah et al., 2013;  
61 Kim et al., 2010) which are obscured in RNA-seq data owing to rapid degradation by the  
62 exosome complex (Andersson et al., 2014b; Core et al., 2014). Indeed, a recent method for  
63 detecting nascent transcription by mapping the location and orientation of actively transcribing  
64 RNA polymerase, called Precision Run-On and Sequencing (PRO-seq), serves as a powerful  
65 assay for both identifying TREs and measuring gene transcription levels (Danko et al., 2015).

66 Here, we used PRO-seq to comprehensively map RNA polymerase in an MCF-7 model  
67 of tamoxifen resistance (Gonzalez-Malerva et al., 2011). These maps provide the location of  
68 hundreds of genes and thousands of distal enhancers whose activities differ between tamoxifen  
69 sensitive (TamS) and resistant (TamR) MCF-7 cells. Results show that, whereas E2/ER $\alpha$   
70 signaling dominates transcriptional activation in the sensitive lines, ER $\alpha$  signaling is suppressed

71 in the resistant lines due to the activation of GDNF-RET signaling which, in turn, modulates its  
72 output by activating the transcription factors SRF and AP-1. Remarkably, TamS MCF-7 cells  
73 express all of the necessary proteins to drive RET receptor signaling, with the exception of one  
74 of the RET ligands (GDNF, NRTN, ARTN, or PSPN). By manipulating GDNF expression in  
75 MCF-7 cells, we determined that high GDNF expression is both necessary and sufficient for  
76 tamoxifen resistance in our MCF-7 cell model. Mechanistically, we found that GDNF promotes  
77 tamoxifen resistance by switching the active state of a bi-stable feedback loop between ER $\alpha$   
78 and a positive feedback loop between GDNF and the transcription factor EGR1. Our findings  
79 appear to be clinically relevant as we found that RET ligand expression is predictive of  
80 responsiveness to endocrine therapies in breast cancer patients. Taken together, our studies  
81 unravel the transcriptional regulatory circuitry that underlies RET-tyrosine kinase dependent  
82 resistance to endocrine therapies, and provides general insights into how escape pathways  
83 facilitate ER $\alpha$ -independent growth in ER+ breast cancers.

## 84 Results

### 85 Genome-wide maps of RNA polymerase in tamoxifen sensitive and resistant MCF-7 cells

86 Although MCF-7 cells are ER+ and largely require E2 for growth and proliferation, a  
87 subset of the heterogeneous MCF-7 cell population continues growing in the presence of anti-  
88 estrogens such as tamoxifen (Coser et al., 2009; Gonzalez-Malerva et al., 2011). We  
89 hypothesized that the *de novo* resistant cells display a unique transcriptional program which can  
90 be used to identify factors that play a causative role in tamoxifen resistance. We used PRO-seq  
91 to map the location and orientation of RNA polymerase in two sensitive and two *de novo*  
92 resistant MCF-7 cell lines that were clonally derived from parental MCF-7 cells (Gonzalez-  
93 Malerva et al., 2011). Consistent with the previous study, we found that the TamS lines (TamS;  
94 B7<sup>TamS</sup> and C11<sup>TamS</sup>) were sensitive to as little as 1 nM of tamoxifen while the TamR lines  
95 (TamR; G11<sup>TamR</sup> and H9<sup>TamR</sup>) were not affected at concentrations as high as 100 nM (**Figure**  
96 **1A**). PRO-seq libraries were prepared from all four cell lines (**Figure 1B**) as previously  
97 described (Kwak et al., 2013; Mahat et al., 2016a) and sequenced to a combined depth of 87  
98 million uniquely mapped reads (**Table S1**). We quantified the similarity of transcription in the  
99 MCF-7 cell subclones using the Pol II abundance in annotated gene bodies. Unbiased  
100 hierarchical clustering grouped B7<sup>TamS</sup> and C11<sup>TamS</sup> TamS lines into a cluster and left G11<sup>TamR</sup>  
101 and H9<sup>TamR</sup> TamR lines as more distantly related outgroups (**Figure 1C**). Although TamR cells  
102 clustered independently, all four MCF-7 clones are nevertheless remarkably highly correlated  
103 (Spearman's Rho > 0.95), suggesting that relatively few transcriptional changes are necessary  
104 to produce the tamoxifen resistance phenotype.

105 We identified 527 genes that are differentially transcribed between TamS and TamR  
106 MCF-7 cells (1% FDR, deSeq2 (Love et al., 2014)), 341 of which were transcribed more highly  
107 in TamS and 186 in TamR cell lines (**Figure 1D**). Several of the differentially transcribed genes,  
108 including, for example, *PGR*, *GREB1*, *IGFBP5*, *HOXD13*, and *GDNF*, were identified in other  
109 models of endocrine resistance (Esseghir et al., 2007; Ghossaini et al., 2014; Mohammed et

110 al., 2013; Morandi et al., 2013; Plaza-Menacho et al., 2010; Zhong et al., 2015), supporting our  
111 hypothesis that transcriptional changes in the MCF-7 model are generally informative about  
112 endocrine resistance. In one example, the diagnostic marker *PGR* is transcribed uniquely in the  
113 B7<sup>TamS</sup> line and is largely absent from G11<sup>TamR</sup> (Figure 1E). To further confirm that  
114 transcriptional changes detected using PRO-seq lead to differences in mRNA abundance, we  
115 validated transcriptional changes in *PGR* and *GREB1* between the B7<sup>TamS</sup> and G11<sup>TamR</sup> MCF-7  
116 cells using qPCR (Figure 1F).

117 Many of the differentially transcribed genes are targets of ER $\alpha$  signaling, including *PGR*,  
118 *GREB1*, *NOS1AP*, and *ELOVL2*, suggesting that changes between TamR and TamS MCF-7  
119 cells can be explained in part by differences in the genomic actions of ER $\alpha$ . To test for an  
120 enrichment of ER $\alpha$  target genes, we asked whether immediate transcriptional changes following  
121 E2 treatment are correlated with genome-wide changes between TamS and TamR MCF-7 cells  
122 using an independent GRO-seq dataset (Hah et al., 2011). Indeed, genes up-regulated by 40  
123 minutes of E2 treatment tend to be transcribed more highly in TamS MCF-7 cells, and genes  
124 down-regulated by E2 are higher in TamR cell lines (Figure 1G). Thus, our data implicates  
125 global changes in the genomic actions of ER $\alpha$  in tamoxifen resistance in this MCF-7 model  
126 system.

127

## 128 **Distal enhancer activities correlate with tamoxifen resistance**

129 To elucidate the mechanisms responsible for changes in gene transcription during  
130 tamoxifen resistance, we sought to discover the location of promoters and active distal  
131 enhancers, collectively called transcriptional regulatory elements (TREs). Nascent transcription  
132 is a highly sensitive way to identify groups of active enhancers (Andersson et al., 2014a; Core et  
133 al., 2014; Danko et al., 2015; Hah et al., 2013), and results in enhancer predictions that are  
134 highly similar to the canonical active enhancer mark, acetylation of histone 3 at lysine 27  
135 (H3K27ac) (Azofeifa and Dowell, 2016; Core et al., 2014; Danko et al., 2015). We used the

136 dREG software package (Danko et al., 2015) followed by a novel peak refinement step that  
137 identifies the regions between divergent paused RNA polymerase (see STAR Methods;  
138 manuscript in preparation) to identify 39,753 TREs that were active in either the TamS or TamR  
139 MCF-7 lines. TREs discovered using dREG were highly enriched for other active enhancer and  
140 promoter marks in MCF-7 cells, especially H3K27ac (**Figure S1A**) as expected based on prior  
141 studies (Azofeifa and Dowell, 2016; Core et al., 2014; Danko et al., 2015; Hah et al., 2013). We  
142 selected a transcribed enhancer downstream of the *CCND1* gene for experimental validation  
143 using luciferase reporter gene assays, and confirmed luciferase activity in both B7<sup>TamS</sup> and  
144 G11<sup>TamR</sup> MCF-7 cells (**Figure S1B and S1C**).

145 We used the abundance of RNA polymerase recruited to each TRE as a proxy for its  
146 transcriptional activity in each MCF-7 subclone to identify differences in 1,452 TREs (812  
147 increased and 640 decreased) (1% FDR, deSeq2) between TamS and TamR MCF-7 cells.  
148 Differentially transcribed TREs were frequently located near differentially expressed genes and  
149 undergo correlated transcriptional changes between the four MCF-7 subclones. *GREB1* and  
150 *PGR*, for example, are each located near several TREs, including both promoters (green) and  
151 enhancers (gray), which undergo changes between TamR and TamS MCF-7 cells that are  
152 similar in direction and magnitude to those of the primary transcription unit which encodes the  
153 mRNA (**Figure 1E**). These results are consistent with a broad correlation between changes at  
154 distal TREs and protein coding promoters (Hah et al., 2011, 2013).

155 We hypothesized that differential transcription at TREs reflect differences in the binding  
156 of specific transcription factors that coordinate changes between TamS and TamR lines. We  
157 identified 12 clusters of motifs enriched in TREs that are differentially active between TamS and  
158 TamR lines (Bonferroni corrected  $p < 0.001$ ; RTFBSDB (Wang et al., 2016)). Remarkably, the  
159 top scoring motif in this analysis corresponds to an estrogen response element (ERE), the  
160 canonical DNA binding sequence which recruits ER $\alpha$  to estrogen responsive enhancers (**Figure**  
161 **1H**). At least two of the top scoring motifs, putatively bound by NFIA and HOXC13, bind a



162 transcription factor that was itself differentially expressed between TamS and TamR MCF-7  
163 cells (**Figure 1H**), suggesting a model in which transcriptional changes of a transcription factor  
164 elicit secondary effects on the activity of TREs, and downstream effects on gene transcription.  
165 Together, although largely correlative, these integrative analyses of gene and TRE  
166 transcriptional activity begin to reveal a transcriptional regulatory network that correlates with  
167 tamoxifen resistance in MCF-7 cells.

168

### 169 **ER $\alpha$ signaling remains functional in endocrine resistant lines**

170 *GREB1* and *PGR* play a critical role in ER $\alpha$  genomic activity in breast cancer cells  
171 (Mohammed et al., 2013, 2015). Our observation that transcription of these ER $\alpha$  co-factors was  
172 lost in the resistant lines (**Figures 1E and 1F**) suggests that ER $\alpha$  signaling may be defective in  
173 the TamR cell lines. Consistent with this expectation, several analyses (i.e., the enrichment of  
174 ER $\alpha$  target genes and EREs, **Figures 1G and 1H**) strongly implicate global changes in the  
175 genomic actions of ER $\alpha$  during the development of tamoxifen resistance. However, these  
176 analyses are correlative and do not directly test the immediate responses to E2 in TamR and  
177 TamS lines.

178 To directly test the hypothesis that the genomic actions of ER $\alpha$  are substantially altered  
179 in the TamR lines, we treated B7<sup>TamS</sup> and G11<sup>TamR</sup> MCF-7 cells for 40 minutes with either E2 or  
180 Tamoxifen, and monitored transcriptional changes using PRO-seq. As expected, RNA  
181 polymerase abundance increased sharply at ER $\alpha$  ChIP-seq peaks (Welboren et al., 2009) in  
182 B7<sup>TamS</sup> MCF-7 cells (**Figure 2A top**), consistent with E2 activating Pol II loading at estrogen-  
183 responsive TREs (Danko et al., 2013; Hah et al., 2013). Surprisingly, E2 also activated  
184 transcription in G11<sup>TamR</sup> lines (**Figure 2A bottom**), strongly suggesting that E2 signaling  
185 continued to function in TamR lines despite the almost complete lack of *GREB1* and *PGR*.  
186 Likewise, direct E2 target genes defined in a previous GRO-seq study (Hah et al., 2011) were  
187 largely up- or down- regulated as expected in both B7<sup>TamS</sup> and G11<sup>TamR</sup> MCF-7 cells (**Figure 2B**).

188 Notably, however, we observed a much more muted effect of E2 on both enhancer and gene  
189 transcription in G11<sup>TamR</sup> compared with B7<sup>TamS</sup> (Figures 2A and 2B), explaining the enrichment  
190 in E2 target genes and ERE motifs in differences between TamS and TamR lines, as described  
191 above. The reduced effect of E2 on transcription may reflect that the lack of *GREB1* or *PGR* in  
192 these lines reduces the effect that ER $\alpha$  has on transcriptional activation. Additionally, however,  
193 we also observed a 2.44-fold reduction in the abundance of ER $\alpha$  mRNA (Figure 2C). Thus, it  
194 appears that, while E2 signaling becomes less responsive in G11<sup>TamR</sup> MCF-7 cells, the E2  
195 signaling pathway remains largely functional and able to affect gene transcription in a stimulus-  
196 dependent manner.

197 One current model of tamoxifen resistance posits that tamoxifen can function as an ER $\alpha$   
198 agonist in resistant breast cancer cells (Osborne et al., 2003). If this hypothesis is correct, then  
199 tamoxifen should promote the activation of ER $\alpha$  target genes in the G11<sup>TamR</sup> cells. However, our  
200 results showed that tamoxifen had no effect on either enhancer or gene transcription in either  
201 B7<sup>TamS</sup> or G11<sup>TamR</sup> lines (Figures 2A and 2B). Looking genome-wide, the tamoxifen treated  
202 B7<sup>TamS</sup> and G11<sup>TamR</sup> MCF-7 cells are very highly correlated with untreated controls (Spearman's  
203 rank correlation  $\rho > 0.99$ ; Figure S2). The lack of transcriptional differences in either line is  
204 consistent with ER $\alpha$  signaling having already been largely shut down under these conditions by  
205 three-days of growth in charcoal-stripped FBS, which depletes endogenous E2 from the media.  
206 Importantly, these results demonstrate that tamoxifen does not appear to function as an agonist  
207 in G11<sup>TamR</sup> cells contrary to one current model for endocrine resistance (Osborne et al., 2003).

208 Given that our findings also suggested that E2 signaling remains functional, but muted in  
209 the TamR line, we next tested whether ER $\alpha$  was required for the growth of our tamoxifen  
210 resistant cells. We found that the viability of both G11<sup>TamR</sup> and H9<sup>TamR</sup> MCF-7 cells was largely  
211 unaffected by treatment with the ER degrader, fulvestrant (Figure 2D). Therefore, endocrine  
212 resistance in G11<sup>TamR</sup> and H9<sup>TamR</sup> MCF-7 cells appears to occur independently of ER $\alpha$  signaling,

213 suggesting that these TamR lines are likely using an alternative pathway for cell survival and  
214 proliferation when grown in the presence of tamoxifen.

215

### 216 **GDNF is necessary and sufficient to confer endocrine resistance in MCF-7 cells**

217 Tyrosine kinase growth factor signaling pathways have been implicated in preclinical  
218 models of endocrine resistance (Benz et al., 1992; Gattelli et al., 2013; Plaza-Menacho et al.,  
219 2010). RET is a cell surface receptor that elicits cell survival signals when bound by one of four  
220 RET ligands, GDNF, NRTN, ARTN, and PSPN (Sariola and Saarma, 2003). Remarkably, one of  
221 these ligands, glial-cell derived neurotrophic factor (GDNF), was among the most highly up-  
222 regulated genes in both G11<sup>TamR</sup> and H9<sup>TamR</sup> MCF-7 lines (**Figure 3A**). We confirmed the  
223 transcriptional differences in *GDNF* between B7<sup>TamS</sup> and G11<sup>TamR</sup> MCF-7 cells using qPCR and  
224 found that GDNF mRNA levels were increased by ~25 fold in the resistant line (**Figure 3B**).  
225 Thus both *GDNF* transcription and mRNA abundance correlate with endocrine resistance in  
226 MCF-7 cells, suggesting that GDNF may contribute to the endocrine resistance phenotype.

227 We directly tested this hypothesis by manipulating GDNF levels in our MCF-7 model. We  
228 first examined the effects of 10 ng/mL of recombinant GDNF protein on the growth of B7<sup>TamS</sup>  
229 cells in the presence of antiestrogens. Remarkably, GDNF completely rescued B7<sup>TamS</sup> MCF-7  
230 cells when challenged with both tamoxifen (**Figure 3C**) and fulvestrant (**Figure S3A**). Moreover,  
231 GDNF treatment without tamoxifen increased the proliferation rate of B7<sup>TamS</sup> MCF-7 cells by  
232 ~20% (**Figure 3C**), suggesting that the growth pathways activated by GDNF can work  
233 independently of ER $\alpha$ . Next we tested whether GDNF was necessary to confer endocrine  
234 resistance in our model system by using short hairpin RNAs (shRNA) to knockdown GDNF in  
235 G11<sup>TamR</sup> MCF-7 cells. Results show that GDNF depletion (GDNF-KD) reduced *GDNF* mRNA  
236 levels by 57.38% (**Figure 3D**) and that these cells were significantly more sensitive to tamoxifen  
237 treatment than G11 cells transfected with a scrambled control (**Figure 3E**). Moreover, endocrine  
238 resistance could be restored to GDNF-KD G11 cells by the addition of 5 ng/ mL recombinant

239 GDNF protein (**Figure 3E**), demonstrating that growth inhibition does not reflect an off-target  
240 effect of the GDNF shRNA. Taken together, these data demonstrate that *GDNF* plays a central  
241 and causal role in establishing endocrine resistance in G11<sup>TamR</sup> MCF-7 cells.

242 Having shown that *GDNF* expression promotes endocrine resistance in our MCF-7 cell  
243 model, we next asked whether *GDNF* mRNA abundance predicts poor relapse free survival  
244 (RFS) using publicly available microarray data (Györfy et al., 2010). Indeed, high *GDNF*  
245 expression significantly predicted poor RFS with a hazard ratio of 2.2 ( $p = 0.028$ ) in one cohort  
246 of 88 breast cancer patients (**Figure 3F**). *GDNF* remained significantly correlated with RFS after  
247 controlling for expression of *ESR1* ( $ER\alpha$ ), *MKI67*, and *HER2* (*ERBB2*) using a multivariate  
248 analysis ( $HR = 2.27$ ;  $p = 0.027$ ). Across 10 sufficiently powered cohorts of patients, *GDNF* had  
249 hazards ratios greater than 1 (i.e., high expression predicts poor RFS outcomes) in seven of  
250 these cohorts (mean = 1.758;  $p = 0.03$ , two-sided Wilcoxon rank sum test). Moreover, the three  
251 studies with significant or borderline significant p-values all had hazards ratios greater than 1  
252 (1.62, 1.75, and 2.2; **Supplementary Table 2**). Taken together, these results suggest a trend in  
253 which high transcription of *GDNF* predicts poor RFS in breast cancer patients, possibly  
254 suggesting that *GDNF* plays a role in endocrine resistance in the clinic.

255

## 256 **ER+ breast cancer cells are poised for RET mediated endocrine resistance, but lack RET** 257 **ligand expression**

258 Increases in the expression RET tyrosine kinase or its co-receptor *GFR $\alpha$ 1* are implicated  
259 in endocrine resistance (Gattelli et al., 2013; Morandi et al., 2013; Plaza-Menacho et al., 2010).  
260 However, RET is itself transcriptionally activated by  $ER\alpha$  and is highly abundant in endocrine  
261 sensitive ER+ breast cancer cell models (Hah et al., 2011). Analysis of mRNA-seq data from  
262 1,177 primary breast cancers in the cancer genome atlas (TCGA) revealed that RET mRNA  
263 expression level was highest in ER+ breast cancer and correlates positively with expression  
264 level of *ESR1* ( $ER\alpha$ ) (Spearman's  $\rho = 0.51$ ,  $p < 2.2e-16$ ; **Figure 4A**), suggesting that it is a

265 direct transcriptional target of ER $\alpha$  *in vivo* as well. *GFRA1* mRNA encodes the GDNF co-  
266 receptor, GFR $\alpha$ 1, and, together with RET, activates RET-ligand signaling. Further analysis of  
267 the mRNA-Seq data set found that *GFRA1* is also strongly correlated with *ESR1* mRNA in  
268 breast cancers (Spearman's  $\rho = 0.67$ ,  $p < 2.2e-16$ ; **Figure S4A**), suggesting that it is also a  
269 direct target of E2 signaling. In our MCF-7 endocrine resistance model, *GFRA1* transcription is  
270 5-fold higher in TamS MCF-7 cells compared to TamR lines and *RET* transcription is not significantly  
271 different (**Figures 4B and 4C**), demonstrating that neither factor is overexpressed in TamR  
272 MCF-7 cells. These observations suggest that additional mechanisms beyond a high RET or  
273 *GFRA1* expression level cause endocrine resistance in cell models and *in vivo*.

274 Our finding that recombinant GDNF was sufficient for endocrine resistance in B7<sup>TamS</sup>  
275 MCF-7 cells demonstrates that GDNF is a key limiting factor, whose absence prevents TamS  
276 cells from taking on a resistant phenotype. To extend this hypothesis to primary breast cancers,  
277 we asked whether GDNF expression is low in general, such that it might limit RET pathway  
278 activation in most ER+ breast cancers. Indeed, GDNF expression was detectable in only 565 of  
279 1,177 primary breast cancers (48%) analyzed by TCGA (**Figure S4B**). In principal, RET  
280 signaling may be activated by any of the four RET ligands (GDNF, NRTN, ARTN, and PSPN).  
281 However, only low levels of NRTN, ARTN, or their co-receptors were detected in primary breast  
282 tumors (**Figures 4D and 4E; Figure S4B**). Thus, we conclude that RET ligand expression is  
283 low compared with cell surface receptors, especially RET and GFR $\alpha$ 1, which are activated in  
284 part by ER $\alpha$ . This contrast between RET receptors and ligands supports a model in which the  
285 RET signaling pathway is 'poised' for endocrine resistance by expression of the receptors and  
286 that limiting levels of *GDNF* expression, or possibly of other RET ligands, ensures endocrine  
287 sensitivity in most tumors.

288 Next we asked whether high RET ligand expression in a subset of ER+ tumors may  
289 explain some cases of endocrine resistance. A careful examination of the GDNF expression  
290 distribution in TCGA breast cancers revealed a long tail, indicating high GDNF expression in a

291 handful of cases in the TCGA dataset (**Figure 4E**). Our hypothesis that GDNF expression limits  
292 RET-dependent endocrine resistance implies that these GDNF-high samples should be prone to  
293 endocrine resistance. We devised a simple non-parametric computational approach, which we  
294 call the ‘outlier score’, to quantify the degree to which GDNF is highly expressed based on the  
295 symmetry of the empirical probability density function (see methods; **Figure 4E, blue line**).  
296 Based on this score, we conservatively estimate that, of 925 ER+ breast cancer patients in the  
297 TCGA dataset, 122 have high expression of at least one of the RET ligands (13%), 57 of which  
298 had high levels of GDNF (**Figure 4F**). If our proposed model that RET ligands are the limiting  
299 factor for endocrine resistance is accurate, cases with this long tail are those that are more likely  
300 to be resistant to endocrine therapies. To test this hypothesis, we analyzed expression  
301 microarray data collected prospectively by biopsies of patients that either respond, or do not  
302 respond, to the aromatase inhibitor letrozole (Miller et al., 2012). A score comprised of the sum  
303 of the outlier scores from all four RET ligands is significantly higher in patients that do not  
304 respond to letrozole treatment ( $p = 0.016$ , one-sided Wilcoxon rank sum test; **Figure 4G**). By  
305 contrast, RET shows no significant difference between patients that respond or do not respond  
306 to letrozole. These results suggest that RET ligand expression, but not RET itself, explain the  
307 differences in response to letrozole in this cohort of patients.

308 To further explore whether RET ligands contribute to endocrine resistance in primary  
309 breast cancers, we asked whether high expression of RET ligands predict RFS. We have  
310 already shown that patients with high expression of GDNF have poor clinical outcomes (**Figure**  
311 **3F**), and we asked whether these results extend to the other three RET ligands. Expression in  
312 the upper quartile of ARTN and NRTN significantly predicts poor RFS with hazards ratios of  
313 1.21 and 1.23, respectively ( $p = 2.5e-3$  and  $8.5e-4$ ), consistent with high expression predicting  
314 poor clinical outcomes (**Figure S4C**). Expression of PSPN was not significantly associated with  
315 RFS ( $HR = 0.88$ ;  $p = 0.056$ ). Our re-analyses of clinical samples support the hypothesis that  
316 elevated expression of RET ligands, especially *GDNF*, but possibly also *ARTN* or *NRTN*,

317 activate the RET signaling pathway and ultimately cause endocrine resistance in clinical  
318 samples, as it does in our MCF-7 cell model. Taken together, our findings support the  
319 hypothesis that RET ligands promote endocrine resistance in a clinical setting.

320

### 321 **GDNF-RET stimulation induces extensive transcriptional changes in MCF-7 cells**

322 We set out to identify the transcriptional targets activated by GDNF-induced RET  
323 signaling. To identify both direct and indirect target genes that respond to GDNF-RET, and to  
324 distinguish between them, we collected kinetic PRO-seq data following 0, 1, and 24 hours of  
325 GDNF treatment in B7<sup>TamS</sup>, C11<sup>TamS</sup>, G11<sup>TamR</sup>, and H9<sup>TamR</sup> MCF-7 cells. We sequenced PRO-  
326 seq libraries to a high read depth (**Table S1**) and verified that biological replicates (B7<sup>TamS</sup> and  
327 C11<sup>TamS</sup>; G11<sup>TamR</sup> and H9<sup>TamR</sup>) have highly correlated transcriptional patterns across the time  
328 course (Spearman's rank correlation  $\rho > 0.95$ ; **Figures S5A and S5B**).

329 We first compared transcriptional changes induced by GDNF between TamS and TamR  
330 MCF-7 cells. Because GDNF is both sufficient for resistance in B7<sup>TamS</sup> and necessary for  
331 resistance in G11<sup>TamR</sup> (**Figures 3C and 3E**), we hypothesized that its effects on gene  
332 transcription are also likely to be highly similar in TamS and TamR MCF-7 cells. Consistent with  
333 this expectation, transcriptional changes induced by GDNF were highly correlated between  
334 TamS and TamR cell lines (Pearson's  $R > 0.73$ ,  $p < 2.2e-16$ ; **Figures S5C and S5D**). As  
335 expected, transcriptional responses were lower in magnitude in TamR MCF-7 cells following  
336 both 1 and 24 hours of GDNF treatment (**Figures S5C and S5D**), likely reflecting a dampened  
337 GDNF response in TamR lines due to higher basal levels of GDNF. Given these observations,  
338 we focused our downstream analyses on TamS MCF-7 cells.

339 We found that GDNF treatment changed the transcription of 4,921 genes, covering  
340 ~15% of expressed transcripts (FDR  $< 0.01$ ; **Figures 5A and 5B**) at either the 1 or 24 hrs time  
341 points. Most targets were regulated immediately in a burst of transcription following 1 hr of  
342 GDNF treatment ( $n = 3,849$  at 1hr). Direct targets activated by 1 hr of GDNF treatment included

343 the immediate early transcription factors, *EGR1* and *ETS2*, which are highly responsive to  
344 growth factor signaling (Gregg and Fraizer, 2011; Roberson et al., 1995; Tarcic et al., 2012; Xie  
345 et al., 2005), and were up-regulated in this study 60-fold and 4-fold, respectively (**Figure 5A**).  
346 Likewise, transcription of *ESR1*, the gene which encodes ER $\alpha$ , was immediately down-regulated  
347 by GDNF signaling (**Figure 5A**), which might explain its lower expression in TamR lines. These  
348 immediate changes in transcription factor expression levels are likely to establish lasting  
349 secondary changes in MCF-7 cells in response to GDNF treatment.

350

### 351 **GDNF treatment stimulates SRF by activating of ERK phosphorylation**

352 We next asked which intracellular signaling pathways are responsible for immediate  
353 transcriptional changes following 1 hr of GDNF signaling. Discriminative motif discovery  
354 comparing TREs which change following 1 hr of GDNF treatment to those which are constant  
355 identified an 8.7-fold enrichment of motifs recognized by serum response factor (SRF) ( $p < 2e-5$ ,  
356 Fisher's Exact Test) (**Figure 5C**). Previous studies have shown that SRF contributes to the  
357 activation of immediate early genes following GDNF treatment in neurons and other cell models  
358 (Norman et al., 1988; Schratt et al., 2001), largely in response to ERK phosphorylation (Katz et  
359 al., 2007). Consistent with this model, Western blotting found that GDNF treatment robustly and  
360 rapidly stimulated ERK phosphorylation in both B7<sup>TamS</sup> and G11<sup>TamR</sup> MCF-7 cells (**Figure 5D**). In  
361 addition to SRF, a motif recognized by AP-1, a heterodimer comprised of FOS, JUN, and ATF  
362 family members, was also enriched 2.9-fold ( $p < 1e-5$ , Fisher's Exact Test) in TREs which  
363 change following GDNF treatment (**Figure 5C**). The enrichment of AP-1 may reflect the direct  
364 effects of ERK signaling on AP-1 activation. Alternatively, this enrichment may be due to the  
365 upregulation of *FOSL1* (**Figure 5A**), an immediate early gene that was upregulated 16-fold  
366 following GDNF treatment. The gene body of *FOSL1* is short enough (8 kb) that the gene may  
367 be completely transcribed and translated within minutes of GDNF activation. Taken together,  
368 these findings support a model in which GDNF exerts its immediate transcriptional effects by the



369 activation of p-ERK and downstream effects on the SRF and AP-1 transcription factor  
370 complexes.

371 Transcription factors may regulate transcription by changing the rates of several steps  
372 early during gene transcription (reviewed by (Fuda et al., 2009)). Although Pol II densities  
373 increase in the bodies of genes activated by GDNF, the pause peak slightly decreased in both  
374 TamS cell lines (**Figure 5E**), suggesting that GDNF increases transcription, in part, by  
375 stimulating the rate at which paused RNA Pol II transitions into productive elongation. To test  
376 this hypothesis more rigorously, we computed changes in the pausing index between GDNF  
377 treated (1 hr) and untreated TamS MCF-7 cells at genes up- or down-regulated by GDNF. To  
378 avoid potentially confounding batch effects we enforced the assumption that global pausing  
379 levels do not change between different samples, as we have described previously (Danko et al.,  
380 2013) (see STAR Methods). Whereas genes that do not undergo changes in gene body  
381 transcription had consistent pausing indices between conditions, up-regulated genes were  
382 observed to have a lower pausing index after 1 hr of GDNF (**Figure 5F**;  $p < 2.2e-16$  Wilcoxon  
383 rank sum test). Likewise, down-regulated genes were observed to have slightly but significantly  
384 higher pausing indices ( $p < 2.2e-16$ ; Wilcoxon rank sum test). These results suggest that GDNF  
385 treatment activates and represses genes in part by changing the rate at which Pol II is  
386 transitions from a paused state into productive elongation.

387

### 388 **ESR1 and GDNF-EGR1 form a bi-stable feedback loop**

389 We set out to define the transcriptional regulatory network associated with GDNF-  
390 dependent endocrine resistance. The dynamics of gene transcription can rigorously separate  
391 direct and indirect target genes following a stimulus (Danko et al., 2013). Genes up-regulated  
392 during the first 1 hour following *GDNF* treatment are largely assumed to be direct targets  
393 because not enough time has elapsed for transcription, translation, and successive rounds of  
394 transcriptional activation. We therefore defined all direct targets of E2 and GDNF signaling as

395 those genes responding by 40 min or 1 hr of treatment, respectively. Secondary targets, defined  
396 as transcriptional changes following 24 hrs of GDNF treatment, were assigned to TFs whose  
397 transcription changed following 1 or 24 hrs using ChIP-seq data in MCF-7 cells (Euskirchen et  
398 al., 2007).

399 The resulting transcriptional regulatory network inferred from the data shows extensive  
400 crosstalk between E2 and GDNF signaling programs (**Figure 6A**). We predict that GDNF/RET  
401 and E2/ER $\alpha$  form a bi-stable feedback loop in which GDNF immediately (1 hr) inactivates the  
402 transcription of ER $\alpha$  and activates transcription of *EGR1*, which, in turn, activates *GDNF*  
403 transcription at 24 hrs (**Figures 6A and 6B**). Thus, *GDNF* is an indirect target of GDNF/RET  
404 signaling that reinforces its own activity through a positive feedback loop dependent on *EGR1*.  
405 In turn, *EGR1* transcription is directly down-regulated following 40 min of E2. Thus, GDNF-RET  
406 and ER $\alpha$  form a bi-stable feedback loop dependent on *EGR1*, in which either ER $\alpha$  or  
407 GDNF/RET signaling can remain at a high level.

408

#### 409 **GDNF-RET signaling down-regulates the E2/ ER $\alpha$ regulatory program**

410 To validate the transcriptional regulatory network inferred to underlie endocrine  
411 resistance, we first focused on validating *ESR1*, which encodes the ER $\alpha$  protein, as a direct and  
412 immediate GDNF target gene. PRO-seq data found that *ESR1* undergoes a two-fold decrease  
413 in transcription following 1 hr of GDNF treatment and that this transcriptional change is stable  
414 through 24 hrs (**Figures 6C and 6D**). These changes in *ESR1* transcription lead to a 2-fold  
415 decrease in *ESR1* mRNA abundance following 4 and 24 hours of GDNF treatment (**Figures 6E**).  
416 Although changes following 1 hour of GDNF treatment are unlikely to reflect indirect effects, it is  
417 nevertheless plausible that a transcription factor encoded by a short gene, such as *FOSL1*, is  
418 transcriptionally activated, translated, and responsible for inactivating *ESR1*.

419 To determine whether changes in *ESR1* transcription are a primary or secondary effect  
420 of GDNF signaling, we set out to estimate the time at which *ESR1* is down-regulated following

421 the addition of GDNF to the cell culture media. To estimate the time at which the *ESR1*  
422 promoter decreases transcriptional activity, we identified the end of the retreating wave of RNA  
423 polymerase II 104,000 bp from the transcription start site at 60 min following GDNF treatment  
424 (Figures 6F). We estimated the elongation rate of *ESR1* in MCF-7 cells to be 1.77 kb/min  
425 between 10 and 40 min of E2 treatment using our previous time-course data (Hah et al., 2011).  
426 At this elongation rate, we estimated that down-regulation of *ESR1* begins at approximately 1.13  
427 min after adding GDNF to the MCF-7 culture media. Likewise, an alternative estimate using the  
428 median elongation rate in MCF-7 cells of 2.1 kb/min (Danko et al., 2013) puts the start time at  
429 ~10 min and 30 sec after the addition of *GDNF*. Thus, *ESR1* is a direct and immediate target of  
430 *GDNF* signaling and is transcriptionally repressed in the minutes following the addition of GDNF  
431 to the culture media.

432 To explore the dynamics with which changes in *ESR1* transcription lead to differences in  
433 ER $\alpha$  protein level, we used Western blotting to track the abundance of ER $\alpha$  and  
434 phosphorylated-ER $\alpha$  protein following the addition of GDNF in B7<sup>TamS</sup> MCF-7 cells. We found a  
435 noticeable effect on ER $\alpha$  protein level as early as two hours after the addition of GDNF and that  
436 changes reached their lowest level at 4 hrs (Figures 6G).

437 After 24 hrs of GDNF treatment, we found that the down-regulation of ER $\alpha$  protein likely  
438 results in the transcriptional down-regulation of E2 target genes. For example, *PGR*, *GREB1*,  
439 *ELOVL2*, and *NOS1AP* are unaffected at 1 hr, but transcriptionally down-regulated between two  
440 and four fold following 24 hrs of GDNF treatment (Figures 6H). We conformed by qPCR that  
441 the GDNF-induced decrease in *PGR* mRNA occurs at 24 hrs but not at 4 hrs (Figures S6A).  
442 Several lines of genome-wide evidence support the indirect effects of GDNF on ER $\alpha$  target  
443 genes as well. First, we find that E2 target genes are more than three-fold enriched in the set of  
444 genes responding to GDNF at 24 hrs, but not at 1 hr (Figure 6I), and that transcriptional  
445 changes at 24 hours of GDNF negatively correlate with 40 min of E2 (Pearson's  $R = -0.14$ ;  $p =$   
446  $4.2e-3$ ). Second, the binding motif that was most enriched in TREs that change Pol II

447 abundance following 24 hrs of GDNF treatment was the ER $\alpha$  binding site ( $p < 1e-9$ , Fisher's  
448 exact test; **Figure S6B**). Taken together, these results demonstrate that GDNF-RET signaling  
449 down-regulates the E2 regulatory program within 6 hours of treatment by immediate effects on  
450 the transcriptional activity of *ESR1* during the first 10 min of GDNF treatment.

451

#### 452 **GDNF-EGR1 feedback loop results in GDNF activation**

453 We next focused on validating the activation loop between *GDNF* and the transcription  
454 factor *EGR1*. Whereas GDNF transcription increased by 16-fold after 24 hrs of GDNF treatment  
455 (**Figure 6B**), no changes were found in any of the earlier time points we examined, strongly  
456 suggesting that *GDNF* transcription is indirectly activated by GDNF-induced RET signaling.  
457 Regarding how GDNF induces its own expression, we predict that GDNF treatment promotes  
458 the upregulation of the transcriptional activator, *EGR1*, which, in turn, binds to the GDNF  
459 promoter thus activating GDNF expression. In support of this hypothesis, we found that *EGR1*  
460 transcription was upregulated more than 30-fold following 1 hr of recombinant GDNF treatment  
461 (**Figure 7A**). These changes in *EGR1* transcription led to an 83-fold increase in *EGR1* mRNA  
462 abundance following 4 hrs of GDNF treatment (**Figure 7B**). In further support of our hypothesis,  
463 we identified a TRE in the first intron of *GDNF* that is bound by *EGR1* in MCF-7 cells (**Figure**  
464 **6B**). Our model also predicts that *EGR1* is directly activated by GDNF signaling, which is likely  
465 mediated by an SRF binding site in the *EGR1* promoter (**Figure 7A**). This finding is consistent  
466 with the enrichment of SRF binding motifs in TREs responding immediately to GDNF activation,  
467 as well as previous reports of SRF activating *EGR1* through a binding site in its promoter in  
468 other cell lines (Gregg and Fraizer, 2011). This data suggests that SRF activated by ERK  
469 signaling directly up-regulates *EGR1* in MCF-7 cells, leading to a positive feedback loop with  
470 GDNF.

471

#### 472 **ER $\alpha$ downregulates *EGR1* transcription**

473 Our bi-stable feedback loop network model predicts that decreasing ER $\alpha$  activity by  
474 tamoxifen treatment should increase the transcription of *GDNF* by increasing *EGR1*. The  
475 network model prediction was based on the observation that *EGR1* decreased ~5-20-fold  
476 starting at just 10 min of E2 treatment (Hah et al., 2011). To test this prediction, we examined  
477 the abundance of *GDNF* mRNA following a time course of tamoxifen treatment. As predicted,  
478 tamoxifen significantly increased both *EGR1* and *GDNF* mRNA levels following 24 hours of  
479 tamoxifen treatment of B7<sup>TamS</sup> MCF-7 cells, but not at 40 min or 4 hrs (**Figures 7C and 7D**).  
480 Moreover, several lines of evidence suggest that this mutual suppressive relationship between  
481 ER $\alpha$  and *EGR1* also holds in primary breast cancers. First, we note a highly significant negative  
482 correlation between *EGR1* and *ESR1* mRNA abundance among ER+ breast cancers analyzed  
483 using TCGA RNA-seq data (Pearson's R= -0.21;  $p = 2.7e-10$ ; **Figure 7E**). Second, we found  
484 that *EGR1* transcription increases substantially in primary tumor biopsies following treatment  
485 with the aromatase inhibitor letrozole ( $p = 1.775e-06$ , Wilcoxon rank sum test; **Figure 7F**) (Miller  
486 et al., 2012). Taken together, several lines of evidence directly implicate ER $\alpha$  in suppressing  
487 *EGR1* expression in both MCF-7 cells as well as in primary tumors.

## 488 Discussion

489 Here we have used genomic tools to reconstruct a gene regulatory network that we  
490 demonstrate is responsible for endocrine resistance in an MCF-7 breast cancer model. Our  
491 approach is uniquely able to distinguish primary from secondary target genes by using PRO-seq  
492 to measure nascent transcription over short ( $\leq 1$  hr) and long (24 hrs) treatments with E2 and  
493 GDNF, two stimuli that are central to our proposed resistance network. Systematic experimental  
494 manipulation of GDNF expression in TamS and TamR cell lines all strongly support a causal  
495 role of this regulatory network in endocrine resistance. Systematic analysis of publicly available  
496 clinical data supports the involvement of this pathway in clinical cases of endocrine resistance  
497 and, most importantly, is, to our knowledge, the first study to suggest that expression of RET  
498 ligands (GDNF, ARTN, NRTN, and PSPN) are often responsible for RET mediated endocrine  
499 resistance in primary tumors. Overall, our study provides mechanistic insights into how growth  
500 factor 'escape pathways' become activated and facilitate ER $\alpha$ -independent growth in ER+  
501 breast cancers.

502 The MCF-7 model of endocrine resistance that we studied here differs in important ways  
503 from prior work in other model systems. Most notably, resistance of G11<sup>TamR</sup> and H9<sup>TamR</sup> MCF-7  
504 lines to ER $\alpha$  degradation by the small molecule fulvestrant demonstrates that endocrine  
505 resistance in our MCF-7 model works independently of ER $\alpha$ . This observation rules out several  
506 mechanisms that have been proposed to explain resistance to aromatase inhibitors, which have  
507 largely proposed E2-independent activation of ER $\alpha$ . For instance, somatic mutations or  
508 truncations in the *ESR1* protein coding sequence can result in the constitutive activation of ER $\alpha$   
509 (Thomas and Ke Gustafsson, 2015). Alternatively, changes in the expression of the ER $\alpha$   
510 transcriptional co-activator AIB1 has been associated with clinical and experimental tamoxifen  
511 resistance by switching tamoxifen, generally an ER $\alpha$  antagonist in mammary tissue, to an  
512 agonist (Osborne et al., 2003; Su et al., 2008). These mechanisms largely depend on the  
513 presence of ER $\alpha$  protein in breast cancer cells, and would not be resistant to ER $\alpha$  degradation

514 by fulvestrant. In addition, other lines of evidence rule out these models as well, including our  
515 direct genome-wide experimental observations demonstrating that E2 remains an agonist and  
516 tamoxifen an antagonist in our MCF-7 model (**Figures 2A and 2B**), as well as a complete lack  
517 of genetic changes in ER $\alpha$  protein-coding sequence that are unique to either G11<sup>TamR</sup> or H9<sup>TamR</sup>  
518 cell lines (data not shown).

519 We are also the first to propose that RET-mediated endocrine resistance occurs when  
520 ER+ breast cancer cells express the RET ligand GDNF. Work on the RET signaling pathway in  
521 endocrine resistance has largely focused on amplifications or increases in the expression of  
522 RET or its co-receptor GFR $\alpha$ 1 in resistance to aromatase inhibitor inhibitors (Morandi et al.,  
523 2013; Plaza-Menacho et al., 2010). However, RET is not significantly different in a cohort of  
524 patients resistant to the aromatase inhibitor letrozole (**Figure 4G**), suggesting that other  
525 mechanisms may occur more commonly in patients than differences in the expression of RET  
526 itself. Indeed, we find that expression of RET and GFR $\alpha$ 1 are both highest in ER+ breast  
527 cancers, likely because of direct transcriptional activation of both genes by E2/ ER $\alpha$  (**Figure 4A;**  
528 **Figure S4A**). Thus, we propose that ER+ breast cancer cells are intrinsically 'poised' for RET  
529 mediated endocrine resistance by the activation of RET cell-surface receptors, but lack  
530 expression of the ligand GDNF.

531 Based on these findings, we hypothesize that increased expression of any one of the  
532 four RET ligands, GDNF, ARTN, NRTN, or PSPN confers endocrine resistance on cells  
533 expressing the RET receptor. In support of this model, we report here that our scoring system  
534 based on RET ligand overexpression in tumors significantly separates breast cancer patients  
535 that respond to letrozole from those who do not (**Figure 4G**). Moreover, we found that RET  
536 ligands are predictive of relapse free survival in other cohorts of patients, even after accounting  
537 for the expression of other prognostic markers such as ER, PR, and HER2 (**Figure 3F**). Several  
538 findings also strongly support the involvement of GDNF in endocrine resistance in our MCF-7  
539 model, most notably the observations that GDNF rescues B7<sup>TamS</sup> lines and that GDNF

540 knockdown in G11 cells restores sensitivity to tamoxifen (**Figure 3E**). These observations are  
541 also supported by existing studies showing that another RET ligand, ARTN, contributes to  
542 tamoxifen resistance in MCF-7 cells (Kang et al., 2010), extending and supporting the findings  
543 reported here. However, there is one RET ligand that is notably an outlier. PSPN does not  
544 appear to have any predictive value in patients, and thus may not play the same role in  
545 resistance as the other three RET ligands. This may reflect the extremely low expression of its  
546 co-receptor, *GFRA4*, in primary breast cancers (**Figure S4B**), preventing PSPN from having  
547 much effect on breast cancer cells. Taken together, these findings suggest that RET ligand  
548 expression, especially GDNF, ARTN, and NRTN, explain endocrine resistance in many cases.

549 One finding that our current study cannot yet explain is that our proposed bi-stable  
550 regulatory network between ER $\alpha$  and GDNF/ EGR1 leads to the activation of GDNF in TamS as  
551 well as in TamR MCF-7 cells. Under our model, tamoxifen treatment in either TamS or TamR  
552 lines leads to the transcriptional activation of GDNF within 24 hours, a prediction of our model  
553 which we were able to validate by qPCR (**Figure 7D**). Thus, it remains unclear why endogenous  
554 transcription at the GDNF locus is not sufficient to confer endocrine resistance in B7<sup>TamS</sup> cells.  
555 One potential explanation is that higher basal GDNF expression in TamR MCF-7 cells grown in  
556 estrogen containing media (**Figures 3A and 3B**) gives TamR lines a “head start” when  
557 switching growth signaling programs from ER $\alpha$  to GDNF/RET. Testing this model will require  
558 up-regulation of endogenous GDNF in TamS cells, possibly through the use of emerging  
559 technologies like activating CRISPR (Perez-Pinera et al., 2013; Thakore et al., 2015).

560 It is also unclear how RET ligand expression is activated in primary tumors. The  
561 abundance of GDNF mRNA appears to be extremely low in primary breast tumors analyzed by  
562 TCGA (**Figures 4D, 4E and, S4B**), which were largely collected before therapeutic intervention  
563 (Ciriello et al., 2015; The Cancer Genome Atlas Network, 2012). Notably, GDNF is not natively  
564 expressed in ER+ TamS MCF-7 cells but rather becomes activated following extended GDNF  
565 treatments. This may suggest that GDNF expression is initiated in tumors by another stimulus-



566 dependent pathway or introduced by another cell type in the tumor microenvironment. This  
567 initial bolus of RET ligand might be required to 'prime' GDNF expression in tumor cells,  
568 activating the bi-stable feedback loop introduced here. Consistent with this, GDNF expression in  
569 tumors may require pro-inflammatory cytokines, such as tumor necrosis factor alpha (TNF $\alpha$ ), to  
570 be transcribed in breast cancer cells (Esseghir et al., 2007). This finding may link poor survival  
571 outcomes in pro-inflammatory tumors (Franco et al., 2015; Zhou et al., 2005) with a GDNF-RET-  
572 mediated resistance to endocrine therapy.

573       Taken together, results reported in the present study reveal a regulatory network that is  
574 responsible for GDNF-RET mediated endocrine resistance in MCF-7 cells. Our work also  
575 supports this pathway in the development of resistance in primary breast cancers, and  
576 specifically supports a model in which RET ligands themselves, rather than expression of the  
577 RET receptors, are the primary determinants of resistance in breast cancer cells. Additional  
578 prospective clinical studies targeting larger cohorts of patients starting endocrine therapies will  
579 be required to fully validate our proposed mechanism of endocrine resistance.

580 **Author Contributions**

581 The project was conceived by CGD, SAC, and SH. All cell culture and molecular experiments  
582 were done by SH, HZ, LJA, CM, and BAM. PRO-seq experiments were conducted by EJR and  
583 SH. Genomic data was analyzed by CGD, TC, and SH. Data collection, experiments, and  
584 analysis was supervised jointly by CGD and SAC. The paper was written by SH, CGD, and SAC  
585 with input from all authors.

586

587 **Acknowledgements**

588 We thank X. Yao, L. Lan, as well as all members of the Danko and Coonrod labs for valuable  
589 insights and discussions. We also thank J. Lewis for input on the manuscript draft. Work in this  
590 publication was supported by NHGRI (National Human Genome Research Institute) grants from  
591 the US National Institutes of Health under award number R01 HG009309-01 to CGD. The  
592 content is solely the responsibility of the authors and does not necessarily represent the official  
593 views of the US National Institutes of Health.

594 **References**

- 595 Andersson, R., Gebhard, C., Miguel-Escalada, I., Hoof, I., Bornholdt, J., Boyd, M., Chen, Y.,  
596 Zhao, X., Schmidl, C., Suzuki, T., et al. (2014a). An atlas of active enhancers across human cell  
597 types and tissues. *Nature* 507, 455–461.
- 598 Andersson, R., Refsing Andersen, P., Valen, E., Core, L.J., Bornholdt, J., Boyd, M., Heick  
599 Jensen, T., and Sandelin, A. (2014b). Nuclear stability and transcriptional directionality separate  
600 functionally distinct RNA species. *Nat. Commun.* 5, 5336.
- 601 Arner, E., Daub, C.O., Vitting-Seerup, K., Andersson, R., Lilje, B., Drablos, F., Lennartsson, A.,  
602 Ronnerblad, M., Hrydziuszko, O., Vitezic, M., et al. (2015). Transcribed enhancers lead waves  
603 of coordinated transcription in transitioning mammalian cells. *Science* (80-. ). 347, 1010–1014.
- 604 Azofeifa, J.G., and Dowell, R.D. (2016). A generative model for the behavior of RNA  
605 polymerase. *Bioinformatics* btw599.
- 606 Benz, C.C., Scott, G.K., Sarup, J.C., Johnson, R.M., Tripathy, D., Coronado, E., Shepard, H.M.,  
607 and Osborne, C.K. (1992). Estrogen-dependent, tamoxifen-resistant tumorigenic growth of  
608 MCF-7 cells transfected with HER2/neu. *Breast Cancer Res. Treat.* 24, 85–95.
- 609 Boulay, A., Breuleux, M., Stephan, C., Fux, C., Brisken, C., Fiche, M., Wartmann, M., Stumm,  
610 M., Lane, H.A., and Hynes, N.E. (2008). The Ret Receptor Tyrosine Kinase Pathway  
611 Functionally Interacts with the ER Pathway in Breast Cancer. *Cancer Res.* 68, 3743–3751.
- 612 Carroll, J.S., Meyer, C.A., Song, J., Li, W., Geistlinger, T.R., Eeckhoute, J., Brodsky, A.S.,  
613 Keeton, E.K., Fertuck, K.C., Hall, G.F., et al. (2006). Genome-wide analysis of estrogen  
614 receptor binding sites. *Nat Genet* 38, 1289–1297.
- 615 Chan, J.Y., LaPara, K., and Yee, D. (2016). Disruption of insulin receptor function inhibits  
616 proliferation in endocrine-resistant breast cancer cells. *Oncogene* 35, 4235–4243.
- 617 Churchman, L.S., and Weissman, J.S. (2011). Nascent transcript sequencing visualizes  
618 transcription at nucleotide resolution. *Nature* 469, 368–373.
- 619 Ciriello, G., Gatza, M.L., Beck, A.H., Wilkerson, M.D., Rhie, S.K., Pastore, A., Zhang, H.,

620 McLellan, M., Yau, C., Kandath, C., et al. (2015). Comprehensive Molecular Portraits of Invasive  
621 Lobular Breast Cancer. *Cell* 163, 506–519.

622 Core, L.J., Waterfall, J.J., and Lis, J.T. (2008). Nascent RNA sequencing reveals widespread  
623 pausing and divergent initiation at human promoters. *Science* (80-. ). 322, 1845–1848.

624 Core, L.J., Martins, A.L., Danko, C.G., Waters, C.T., Siepel, A., and Lis, J.T. (2014). Analysis of  
625 transcription start sites from nascent RNA supports a unified architecture of mammalian  
626 promoters and enhancers. *Nat. Genet. In Press*.

627 Coser, K.R., Wittner, B.S., Rosenthal, N.F., Collins, S.C., Melas, A., Smith, S.L., Mahoney, C.J.,  
628 Shioda, K., Isselbacher, K.J., Ramaswamy, S., et al. (2009). Antiestrogen-resistant subclones of  
629 MCF-7 human breast cancer cells are derived from a common monoclonal drug-resistant  
630 progenitor. *Proc. Natl. Acad. Sci. U. S. A.* 106, 14536–14541.

631 Danko, C.G., Hah, N., Luo, X., Martins, A.L. AL, Core, L., Lis, J.T., Siepel, A., and Kraus, W.L.  
632 (2013). Signaling Pathways Differentially Affect RNA Polymerase II Initiation, Pausing, and  
633 Elongation Rate in Cells. *Mol. Cell* 50, 212–222.

634 Danko, C.G., Hyland, S.L., Core, L.J., Martins, A.L., Waters, C.T., Lee, H.W., Cheung, V.G.,  
635 Kraus, W.L., Lis, J.T., and Siepel, A. (2015). Identification of active transcriptional regulatory  
636 elements from GRO-seq data. *Nat. Methods advance on*.

637 Duarte, F.M., Fuda, N.J., Mahat, D.B., Core, L.J., Guertin, M.J., and Lis, J.T. (2016).  
638 Transcription factors GAF and HSF act at distinct regulatory steps to modulate stress-induced  
639 gene activation. *Genes Dev.* 30, 1731–1746.

640 Esseghir, S., Todd, S.K., Hunt, T., Poulosom, R., Plaza-Menacho, I., Reis-Filho, J.S., and Isacke,  
641 C.M. (2007). A Role for Glial Cell Derived Neurotrophic Factor Induced Expression by  
642 Inflammatory Cytokines and RET/GFR 1 Receptor Up-regulation in Breast Cancer. *Cancer Res.*  
643 67, 11732–11741.

644 Euskirchen, G.M., Rozowsky, J.S., Wei, C.-L., Lee, W.H., Zhang, Z.D., Hartman, S.,  
645 Emanuelsson, O., Stolc, V., Weissman, S., Gerstein, M.B., et al. (2007). Mapping of

646 transcription factor binding regions in mammalian cells by ChIP: comparison of array- and  
647 sequencing-based technologies. *Genome Res.* 17, 898–909.

648 Fang, F., Yu, M., Cavanagh, M.M., Hutter Saunders, J., Qi, Q., Ye, Z., Le Saux, S., Sultan, W.,  
649 Turgano, E., Dekker, C.L., et al. (2016). Expression of CD39 on Activated T Cells Impairs their  
650 Survival in Older Individuals. *Cell Rep.* 14, 1218–1231.

651 Franco, H.L., Nagari, A., and Kraus, W.L. (2015). TNF $\alpha$  Signaling Exposes Latent Estrogen  
652 Receptor Binding Sites to Alter the Breast Cancer Cell Transcriptome. *Mol. Cell* 58, 21–34.

653 Fuda, N.J., Ardehali, M.B., and Lis, J.T. (2009). Defining mechanisms that regulate RNA  
654 polymerase II transcription in vivo. *Nature* 461, 186–192.

655 Gattelli, A., Nalvarte, I., Boulay, A., Roloff, T.C., Schreiber, M., Carragher, N., Macleod, K.K.,  
656 Schleder, M., Lienhard, S., Kenner, L., et al. (2013). Ret inhibition decreases growth and  
657 metastatic potential of estrogen receptor positive breast cancer cells. *EMBO Mol. Med.* 5, 1335–  
658 1350.

659 Ghousaini, M., Edwards, S.L., Michailidou, K., Nord, S., Cowper-Sal Lari, R., Desai, K., Kar, S.,  
660 Hillman, K.M., Kaufmann, S., Glubb, D.M., et al. (2014). Evidence that breast cancer risk at the  
661 2q35 locus is mediated through IGFBP5 regulation. *Nat. Commun.* 4, 4999.

662 Gonzalez-Malerva, L., Park, J., Zou, L., Hu, Y., Moradpour, Z., Pearlberg, J., Sawyer, J.,  
663 Stevens, H., Harlow, E., and LaBaer, J. (2011). High-throughput ectopic expression screen for  
664 tamoxifen resistance identifies an atypical kinase that blocks autophagy. *Proc. Natl. Acad. Sci.*  
665 *U. S. A.* 108, 2058–2063.

666 Gregg, J., and Fraizer, G. (2011). Transcriptional Regulation of EGR1 by EGF and the ERK  
667 Signaling Pathway in Prostate Cancer Cells. *Genes Cancer* 2, 900–909.

668 Györfy, B., Lanczky, A., Eklund, A.C., Denkert, C., Budczies, J., Li, Q., and Szallasi, Z. (2010).  
669 An online survival analysis tool to rapidly assess the effect of 22,277 genes on breast cancer  
670 prognosis using microarray data of 1,809 patients. *Breast Cancer Res. Treat.* 123, 725–731.

671 Hah, N., Danko, C.G., Core, L., Waterfall, J.J., Siepel, A., Lis, J.T., and Kraus, W.L. (2011). A  
Horibata et. al. (2017)

672 rapid, extensive, and transient transcriptional response to estrogen signaling in breast cancer  
673 cells. *Cell* 145, 622–634.

674 Hah, N., Murakami, S., Nagari, A., Danko, C., and Kraus, W.L. (2013). Enhancer Transcripts  
675 Mark Active Estrogen Receptor Binding Sites. *Genome Res.*

676 Kang, J., Qian, P.X., Pandey, V., Perry, J.K., Miller, L.D., Liu, E.T., Zhu, T., Liu, D.X., and Lobie,  
677 P.E. (2010). Artemin is estrogen regulated and mediates antiestrogen resistance in mammary  
678 carcinoma. *Oncogene* 29, 3228–3240.

679 Katz, M., Amit, I., and Yarden, Y. (2007). Regulation of MAPKs by growth factors and receptor  
680 tyrosine kinases. *Biochim. Biophys. Acta* 1773, 1161–1176.

681 Kim, T.-K., Hemberg, M., Gray, J.M., Costa, A.M., Bear, D.M., Wu, J., Harmin, D.A., Laptewicz,  
682 M., Barbara-Haley, K., Kuersten, S., et al. (2010). Widespread transcription at neuronal activity-  
683 regulated enhancers. *Nature* 465, 182–187.

684 Kuhn, R.M., Haussler, D., and Kent, W.J. (2013). The UCSC genome browser and associated  
685 tools. *Brief. Bioinform.* 14, 144–161.

686 Kwak, H., Fuda, N.J., Core, L.J., and Lis, J.T. (2013). Precise maps of RNA polymerase reveal  
687 how promoters direct initiation and pausing. *Science* 339, 950–953.

688 Li, H., and Durbin, R. (2009). Fast and accurate short read alignment with Burrows-Wheeler  
689 transform. *Bioinformatics* 25, 1754–1760.

690 Love, M.I., Huber, W., and Anders, S. (2014). Moderated estimation of fold change and  
691 dispersion for RNA-seq data with DESeq2. *Genome Biol.* 15, 550.

692 Mahat, D.B., Kwak, H., Booth, G.T., Jonkers, I.H., Danko, C.G., Patel, R.K., Waters, C.T.,  
693 Munson, K., Core, L.J., and Lis, J.T. (2016a). Base-pair-resolution genome-wide mapping of  
694 active RNA polymerases using precision nuclear run-on (PRO-seq). *Nat. Protoc.* 11, 1455–1476.

695 Mahat, D.B., Salamanca, H.H., Duarte, F.M., Danko, C.G., and Lis, J.T. (2016b). Mammalian  
696 Heat Shock Response and Mechanisms Underlying Its Genome-wide Transcriptional  
697 Regulation. *Mol. Cell* 62, 63–78.

698 Martin, M. (2011). Cutadapt removes adapter sequences from high-throughput sequencing  
699 reads. *EMBnet.journal* 17, 10–12.

700 Miller, W.R., Larionov, A., Anderson, T.J., Evans, D.B., and Dixon, J.M. (2012). Sequential  
701 changes in gene expression profiles in breast cancers during treatment with the aromatase  
702 inhibitor, letrozole. *Pharmacogenomics J.* 12, 10–21.

703 Mohammed, H., D'Santos, C., Serandour, A.A., Ali, H.R., Brown, G.D., Atkins, A., Rueda, O.M.,  
704 Holmes, K.A., Theodorou, V., Robinson, J.L.L., et al. (2013). Endogenous purification reveals  
705 GREB1 as a key estrogen receptor regulatory factor. *Cell Rep.* 3, 342–349.

706 Mohammed, H., Russell, I.A., Stark, R., Rueda, O.M., Hickey, T.E., Tarulli, G.A., Serandour,  
707 A.A., Serandour, A.A.A., Birrell, S.N., Bruna, A., et al. (2015). Progesterone receptor modulates  
708 ER $\alpha$  action in breast cancer. *Nature* 523, 313–317.

709 Morandi, A., Martin, L.-A., Gao, Q., Pancholi, S., Mackay, A., Robertson, D., Zvelebil, M.,  
710 Dowsett, M., Plaza-Menacho, I., and Isacke, C.M. (2013). GDNF-RET signaling in ER-positive  
711 breast cancers is a key determinant of response and resistance to aromatase inhibitors. *Cancer*  
712 *Res.* 73, 3783–3795.

713 Nojima, T., Gomes, T., Grosso, A.R.F., Kimura, H., Dye, M.J., Dhir, S., Carmo-Fonseca, M., and  
714 Proudfoot, N.J. (2015). Mammalian NET-Seq Reveals Genome-wide Nascent Transcription  
715 Coupled to RNA Processing. *Cell* 161, 526–540.

716 Norman, C., Runswick, M., Pollock, R., and Treisman, R. (1988). Isolation and properties of  
717 cDNA clones encoding SRF, a transcription factor that binds to the c-fos serum response  
718 element. *Cell* 55, 989–1003.

719 Osborne, C.K., Bardou, V., Hopp, T.A., Chamness, G.C., Hilsenbeck, S.G., Fuqua, S.A.W.,  
720 Wong, J., Allred, D.C., Clark, G.M., and Schiff, R. (2003). Role of the estrogen receptor  
721 coactivator AIB1 (SRC-3) and HER-2/neu in tamoxifen resistance in breast cancer. *J. Natl.*  
722 *Cancer Inst.* 95, 353–361.

723 Park, J.W., Liu, M.C., Yee, D., Yau, C., van 't Veer, L.J., Symmans, W.F., Paoloni, M.,  
Horibata et. al. (2017)

724 Perlmutter, J., Hylton, N.M., Hogarth, M., et al. (2016). Adaptive Randomization of Neratinib in  
725 Early Breast Cancer. *N. Engl. J. Med.* 375, 11–22.

726 Perez-Pinera, P., Kocak, D.D., Vockley, C.M., Adler, A.F., Kabadi, A.M., Polstein, L.R., Thakore,  
727 P.I., Glass, K.A., Ousterout, D.G., Leong, K.W., et al. (2013). RNA-guided gene activation by  
728 CRISPR-Cas9–based transcription factors. *Nat. Methods* 10, 973–976.

729 Planas-Silva, M.D., and Weinberg, R.A. (1997). Estrogen-dependent cyclin E-cdk2 activation  
730 through p21 redistribution. *Mol. Cell. Biol.* 17, 4059–4069.

731 Plaza-Menacho, I., Morandi, A., Robertson, D., Pancholi, S., Drury, S., Dowsett, M., Martin, L.-  
732 A., and Isacke, C.M. (2010). Targeting the receptor tyrosine kinase RET sensitizes breast  
733 cancer cells to tamoxifen treatment and reveals a role for RET in endocrine resistance.  
734 *Oncogene* 29, 4648–4657.

735 Prall, O.W., Rogan, E.M., and Sutherland, R.L. (1998). Estrogen regulation of cell cycle  
736 progression in breast cancer cells. *J. Steroid Biochem. Mol. Biol.* 65, 169–174.

737 Prenzel, T., Begus-Nahrman, Y., Kramer, F., Hennion, M., Hsu, C., Gorsler, T., Hintermair, C.,  
738 Eick, D., Kremmer, E., Simons, M., et al. (2011). Estrogen-Dependent Gene Transcription in  
739 Human Breast Cancer Cells Relies upon Proteasome-Dependent Monoubiquitination of Histone  
740 H2B. *Cancer Res.* 71, 5739–5753.

741 Quinlan, A.R., and Hall, I.M. (2010). BEDTools: a flexible suite of utilities for comparing genomic  
742 features. *Bioinformatics* 26, 841–842.

743 Roberson, M.S., Misra-Press, A., Laurance, M.E., Stork, P.J., and Maurer, R.A. (1995). A role  
744 for mitogen-activated protein kinase in mediating activation of the glycoprotein hormone alpha-  
745 subunit promoter by gonadotropin-releasing hormone. *Mol. Cell. Biol.* 15, 3531–3539.

746 Sariola, H., and Saarma, M. (2003). Novel functions and signalling pathways for GDNF. *J. Cell*  
747 *Sci.* 116.

748 Schrott, G., Weinhold, B., Lundberg, A.S., Schuck, S., Berger, J., Schwarz, H., Weinberg, R.A.,  
749 Rütger, U., and Nordheim, A. (2001). Serum response factor is required for immediate-early



750 gene activation yet is dispensable for proliferation of embryonic stem cells. *Mol. Cell. Biol.* *21*,  
751 2933–2943.

752 Schwalb, B., Michel, M., Zacher, B., Fruhauf, K., Demel, C., Tresch, A., Gagneur, J., and  
753 Cramer, P. (2016). TT-seq maps the human transient transcriptome. *Science* (80-. ). *352*, 1225–  
754 1228.

755 Shannon, P., Markiel, A., Ozier, O., Baliga, N.S., Wang, J.T., Ramage, D., Amin, N.,  
756 Schwikowski, B., and Ideker, T. (2003). Cytoscape: a software environment for integrated  
757 models of biomolecular interaction networks. *Genome Res.* *13*, 2498–2504.

758 Shiau, A.K., Barstad, D., Loria, P.M., Cheng, L., Kushner, P.J., Agard, D.A., and Greene, G.L.  
759 (1998). The structural basis of estrogen receptor/coactivator recognition and the antagonism of  
760 this interaction by tamoxifen. *Cell* *95*, 927–937.

761 Su, Q., Hu, S., Gao, H., Ma, R., Yang, Q., Pan, Z., Wang, T., and Li, F. (2008). Role of AIB1 for  
762 Tamoxifen Resistance in Estrogen Receptor-Positive Breast Cancer Cells. *Oncology* *75*, 159–  
763 168.

764 Tarcic, G., Avraham, R., Pines, G., Amit, I., Shay, T., Lu, Y., Zwang, Y., Katz, M., Ben-Chetrit,  
765 N., Jacob-Hirsch, J., et al. (2012). EGR1 and the ERK-ERF axis drive mammary cell migration  
766 in response to EGF. *FASEB J.* *26*, 1582–1592.

767 Team, R.D.C. (2010). R: A language and environment for statistical computing. In R Foundation  
768 for Statistical Computing.

769 Thakore, P.I., D'Ippolito, A.M., Song, L., Safi, A., Shivakumar, N.K., Kabadi, A.M., Reddy, T.E.,  
770 Crawford, G.E., and Gersbach, C.A. (2015). Highly specific epigenome editing by CRISPR-  
771 Cas9 repressors for silencing of distal regulatory elements. *Nat. Methods* *12*, 1143–1149.

772 The Cancer Genome Atlas Network (2012). Comprehensive molecular portraits of human breast  
773 tumours. *Nature* *490*, 61–70.

774 Thomas, C., and Ke Gustafsson, J.-Å. (2015). Estrogen receptor mutations and functional  
775 consequences for breast cancer. *Trends Endocrinol. Metab.* *26*, 467–476.

- 776 Wakeling, A.E. (2000). Similarities and distinctions in the mode of action of different classes of  
777 antioestrogens. *Endocr. Relat. Cancer* 7, 17–28.
- 778 Wang, Z., Martins, A.L., and Danko, C.G. (2016). RTFBSDB: an integrated framework for  
779 transcription factor binding site analysis. *Bioinformatics* btw338.
- 780 Welboren, W.-J., van Driel, M.A., Janssen-Megens, E.M., van Heeringen, S.J., Sweep, F.C.,  
781 Span, P.N., and Stunnenberg, H.G. (2009). ChIP-Seq of ERalpha and RNA polymerase II  
782 defines genes differentially responding to ligands. *EMBO J.* 28, 1418–1428.
- 783 Xie, J., Bliss, S.P., Nett, T.M., Ebersole, B.J., Sealton, S.C., and Roberson, M.S. (2005).  
784 Transcript Profiling of Immediate Early Genes Reveals a Unique Role for Activating  
785 Transcription Factor 3 in Mediating Activation of the Glycoprotein Hormone  $\alpha$ -Subunit Promoter  
786 by Gonadotropin-Releasing Hormone. *Mol. Endocrinol.* 19, 2624–2638.
- 787 Zhong, Z., Shan, M., Wang, J., Liu, T., Xia, B., Niu, M., Ren, Y., and Pang, D. (2015). HOXD13  
788 methylation status is a prognostic indicator in breast cancer. *Int. J. Clin. Exp. Pathol.* 8, 10716–  
789 10724.
- 790 Zhou, Y., Eppenberger-Castori, S., Marx, C., Yau, C., Scott, G.K., Eppenberger, U., and  
791 Benz, C.C. (2005). Activation of nuclear factor- $\kappa$ B (NF $\kappa$ B) identifies a high-risk subset of  
792 hormone-dependent breast cancers. *Int. J. Biochem. Cell Biol.* 37, 1130–1144.

793 **Main figure legends**

794

795 **Figure 1: ER target genes are uniquely expressed in TamS cells.**

796 (A) Cell viability of tamoxifen sensitive (TamS; B7<sup>TamS</sup> and C11<sup>TamS</sup>) and resistant (TamR;  
797 G11<sup>TamR</sup> and H9<sup>TamR</sup>) MCF-7 cells upon treatment with 0 (vehicle; EtOH), 10<sup>-11</sup>, 10<sup>-10</sup>, 10<sup>-9</sup>,  
798 10<sup>-8</sup>, or 10<sup>-7</sup> M of tamoxifen for 4 days. Data are represented as mean ± SEM (n=3).

799 (B) Experimental setup for PRO-seq. PRO-seq libraries were prepared from all four cell lines  
800 grown in the absence of tamoxifen for 3 days.

801 (C) Spearman's rank correlation of RNA polymerase abundance in the gene bodies (+1000  
802 bp to the annotation end) of TamS and TamR cell lines.

803 (D) MA plot showing significantly changed genes (red) that are higher in TamS (top) or  
804 TamR (bottom) MCF-7 lines. Genes highlighted in the plots which are ERα targets are  
805 highlighted in blue.

806 (E) Transcription near the *PGR* and *GREB1* loci in B7<sup>TamS</sup> and G11<sup>TamR</sup> cells. PRO-seq  
807 densities on the sense and anti-sense strand are shown in red and blue, respectively.  
808 dREG scores are shown in green. Enhancers and promoters are shown in grey and light  
809 green shading, respectively. Arrows indicate the direction of gene annotations.

810 (F) *PGR* and *GREB1* mRNA expression levels in B7<sup>TamS</sup> and G11<sup>TamR</sup> cells. Data are  
811 represented as mean ± SEM (n=3 for *PGR*; n = 4 for *GREB1*). \*\*\*\* p < 0.0001. G11<sup>TamR</sup>  
812 is normalized to B7<sup>TamS</sup>.

813 (G) Boxplots represent fold-change between TamS and TamR of genes that are either up- or  
814 down-regulated following 40 minutes of estrogen (E2) in Hah et. al. (2011). Spearman's  
815 Rho= 0.185, p < 2.2e-16.

816 (H) Motifs enriched in TREs that have different amounts of RNA polymerase between TamS  
817 and TamR cells compared with TREs that have consistent levels.

818

819 **Figure 2: Tamoxifen resistant lines have functional ER $\alpha$  signaling**

820 (A) Heatmap of changes in RNA polymerase abundance following 40 minutes of E2 or  
821 tamoxifen treatment near ER $\alpha$  bindings sites in B7<sup>TamS</sup> and G11<sup>TamR</sup> cells.

822 (B) Violin plots show fold changes in the indicated MCF-7 clone following 40 minutes of E2  
823 or tamoxifen treatment at genes up- or down-regulated by E2 in Hah et. al.  
824 (2011). Up- and down-regulated genes are in green and blue, respectively.

825 (C) *ESR1* mRNA expression levels in B7<sup>TamS</sup> and G11<sup>TamR</sup> cells. Data are represented as  
826 mean  $\pm$  SEM (n=3). \*\*\*\* p < 0.0001.

827 (D) Cell viability of TamS and TamR cells upon treatment with 0 (vehicle; DMSO), 10<sup>-11</sup>, 10<sup>-10</sup>,  
828 10<sup>-9</sup>, 10<sup>-8</sup>, or 10<sup>-7</sup> M fulvestrant (ER degrader) for 4 days. Data are represented as mean  
829  $\pm$  SEM (n=3).

830

831 **Figure 3: *GDNF* is responsible for tamoxifen resistance in MCF-7 cells**

832 (A) Transcription near the *GDNF* locus in B7<sup>TamS</sup> and G11<sup>TamR</sup> cells. PRO-seq densities on  
833 sense strand and anti-sense strand are shown in red and blue, respectively. dREG  
834 scores are shown in green. The region near the *GDNF* promoter is shown in light green  
835 shading. Arrow indicates the direction of gene annotations.

836 (B) *GDNF* mRNA expression levels in B7<sup>TamS</sup> and G11<sup>TamR</sup> cells. Data are represented as  
837 mean  $\pm$  SEM (n=3). \*\* p < 0.005.

838 (C) Cell viability of B7<sup>TamS</sup> cells in the presence or absence of 10 ng/ml *GDNF* and/or 100  
839 mM tamoxifen for 4 days. Data are represented as mean  $\pm$  SEM (n=3). \* p < 0.05, \*\*\* p <  
840 0.0005.

841 (D) *GDNF* mRNA expression levels in G11<sup>TamR</sup> scrambled (SCR) and G11<sup>TamR</sup> *GDNF*  
842 knockdown (*GDNF*-KD) cells. Data are represented as mean  $\pm$  SEM (n=3). \*\*\*\*  $p <$   
843 0.0001.  
844 (E) Relative cell number of G11<sup>TamR</sup> scrambled (SCR) and G11<sup>TamR</sup> *GDNF* knockdown  
845 (*GDNF*-KD) cells after 4 days without or with 5  $\mu$ M tamoxifen and/or 5 ng/ml *GDNF*  
846 treatment. Data are represented as mean  $\pm$  SEM (n=9). \*  $p <$  0.05.  
847 (F) Kaplan Meier (KM) plot of relapse free survival (RFS) in a cohort of 88 breast cancer  
848 patients with low (black) or high (red) *GDNF* expression.

849

850 **Figure 4: Expression of RET ligands contributes to endocrine resistance.**

851 (A) Density scatterplot showing *RET* and *ESR1* expression in mRNA-seq data from 1,177  
852 primary breast cancer models in the cancer genome atlas (TCGA). Spearman's  $\rho = 0.51$ ,  
853  $p = 1.2e-60$ .  
854 (B) Transcription near the *RET* locus in B7<sup>TamS</sup> and G11<sup>TamR</sup> cells. PRO-seq densities on  
855 sense strand and anti-sense strand are shown in red and blue, respectively. dREG  
856 scores are shown in green. Enhancers and promoters are shown in grey and light green  
857 shading, respectively. Arrow indicates the directional movement of transcribed genes.  
858 (C) Dot plot shows *RET* transcription levels in TamS and TamR MCF-7 cells.  
859 (D) Density scatterplots show the expression of RET ligands (*GDNF*, *NRTN*, *ARTN*, and  
860 *PSPN*) versus *ESR1* based on mRNA-seq data from 1,177 primary breast cancers.  
861 (E) RET ligand expression distribution in ER+ breast cancers. The dotted blue line  
862 represents 2.5 times the range between the 25<sup>th</sup> and 50<sup>th</sup> percentile.  
863 (F) Fraction of ER+ breast cancers (n = 925) with at least one RET ligand exceeding the  
864 threshold shown in panel E (shown in dark blue, n = 122). Among the 4 RET ligands,  
865 *GDNF* was the most highly expressed (n = 60).

866 (G) Boxplots show RET ligands score and RET expression levels in patients that respond or  
867 do not respond to aromatase inhibitor letrozole. \*  $p = 0.016$ .

868

869 **Figure 5: GDNF activates thousands of target genes at the level of pause release.**

870 (A-B) MA plot shows significantly upregulated and downregulated genes (red) following 1 hour

871 (A) or 24 hours (B) of GDNF treatment in TamS MCF-7 cells.

872 (C) Motifs enriched in TREs that have different amounts of RNA polymerase following 1 hour  
873 of GDNF treatment compared with TREs that have consistent levels.

874 (D) Immunoblot analysis of p-ERK in serum deprived B7<sup>TamS</sup> and G11<sup>TamR</sup> cells treatment  
875 with 10 ng/mL GDNF.

876 (E) Heatmap depicting changes in RNA polymerase density following 1 hour of GDNF  
877 treatment in B7<sup>TamS</sup> MCF-7 cells.

878 (F) Changes in pausing index between treated (1 hour) and untreated TamS MCF-7 cells at  
879 the indicated class of genes.

880

881 **Figure 6: Bi-stable feedback loop between *ESR1*, *EGR1*, and *GDNF*.**

882 (A) Transcriptional regulatory network of GDNF-dependent endocrine resistance highlighting  
883 the bi-stable feedback loop inferred between *ESR1*, *EGR1*, and *GDNF*. Each point  
884 represents a gene regulated following 1 or 24 hours of GDNF signaling. Only  
885 transcription factors or signaling molecules are shown. Blue and red edges represent  
886 activation or repression relationships, respectively.

887 (B) Transcription near the *GDNF* locus in B7<sup>TamS</sup> and G11<sup>TamR</sup> cells. PRO-seq densities on  
888 sense strand and anti-sense strand are shown in red and blue, respectively. dREG  
889 scores are shown in green. The promoter is shown in light green shading. Arrows  
890 indicate the direction encoding annotated genes.

891 (C) Dot plots of transcription levels of *ESR1* B7<sup>TamS</sup> and G11<sup>TamR</sup> cells following GDNF

892 treatment.

893 (D) Transcription in the *ESR1* gene in B7<sup>TamS</sup> and G11<sup>TamR</sup> cells. PRO-seq densities on  
894 sense strand and anti-sense strand are shown in red and blue, respectively. dREG  
895 scores are shown in green. Enhancers and promoters are shown in grey and light green  
896 shading, respectively. Arrow indicates the direction encoding annotated genes.

897 (E) *ESR1* mRNA expression levels in B7<sup>TamS</sup> cells following 10 ng/mL GDNF treatment. Data  
898 are represented as mean  $\pm$  SEM (n=3). \*\*\*\* p < 0.0001.

899 (F) Difference in read counts in 3kb windows along *ESR1* between 1 hours of GDNF and  
900 untreated TamS MCF-7 cells, The location of the wave of RNA polymerase along *ESR1*  
901 was identified using a hidden Markov model and is represented by the yellow box.

902 (G) Immunoblot analysis of ER $\alpha$  and p-ER $\alpha$  in B7<sup>TamS</sup> and G11<sup>TamR</sup> cells treatment with 10  
903 ng/mL for 0, 1, 2, and 4 hours.

904 (H) Dot plots representing transcription levels of ER $\alpha$  target genes (*PGR*, *GREB1*, *ELOVL2*,  
905 and *NOS1AP*) following a timecourse of GDNF treatment.

906 (I) Bar plot showing the fraction of genes whose transcription is up-regulated by 40 min. of  
907 E2 in all RefSeq annotated genes (left) or those which are downregulated by 1 (center)  
908 or 24 hours (right) of GDNF treatment. E2 target genes were enriched in those down-  
909 regulated following 24 hrs of GDNF treatment. The Y axis denotes the fraction of genes  
910 that are direct up-regulated E2 targets (defined based on Hah et. al. (2011) and also up-  
911 regulated in B7<sup>TamS</sup>). # p = 1.098e-10, ## p = 6.556999e-19. Fisher's exact test was used  
912 for statistical analysis.

913

#### 914 **Figure 7: Validation of bi-stable feedback loop in MCF-7 cells and primary breast tumors**

915 (A) Transcription at the *EGR1* locus in B7<sup>TamS</sup> and G11<sup>TamR</sup> cells before and after treatment  
916 with GDNF. PRO-seq densities on sense strand and anti-sense strand are shown in red  
917 and blue, respectively. dREG scores are shown in green. The number of reads mapping

918 in *EGR1* and SRF ChIP-seq data is shown in black. Arrow indicates the direction of  
919 annotated genes.

920 (B) *EGR1* mRNA expression level in B7<sup>TamS</sup> cell after treatment with 10 ng/mL GDNF for 4 or  
921 24 hrs. Data are represented as mean  $\pm$  SEM (n=3). \*\*  $p < 0.01$ , \*\*\*  $p \leq 0.001$ .

922 (C) *EGR1* mRNA expression level in G11<sup>TamR</sup> cells after treatment without (DMSO) or with  
923 10 ng/mL GDNF for 4 or 24 hrs. Data are represented as mean  $\pm$  SEM (n=3). \*  $p < 0.05$ .

924 (D) *GDNF* mRNA expression levels in G11<sup>TamR</sup> cells after treatment without (DMSO) or with  
925 10 ng/mL GDNF for 4 or 24 hrs. Data are represented as mean  $\pm$  SEM (n=3). \*\*  $p <$   
926 0.005.

927 (E) Density scatterplots show the expression of *EGR1* versus *ESR1* based on mRNA-seq  
928 data from 1,177 primary breast cancers. ER+ breast cancers (n= 925), defined based on  
929 *ESR1* expression ( $>1e-5$ ), are highlighted in color. The trend line was calculated using  
930 Deming regression in the ER+ breast cancers (Pearson's  $R = -0.21$ ;  $p = 2.7e-10$ ).

931 (F) Boxplots show *EGR1* expression level before or following 90 days of treatment with  
932 letrozole ( $p = 1.8e-6$ , Wilcoxon Rank Sum Test).



933 **Supplemental figure legends**

934

935 **Figure S1: dREG identifies highly enriched active enhancers and promoter marks in**

936 **MCF-7 cells**

937 (A) Heatmap depicting PRO-seq, Dnase-I-seq, H3K27ac, and H3K4me3 near 39,753  
938 transcriptional regulatory elements (TREs) identified using dREG-HD from PRO-seq  
939 data (left) in TamS and TamR MCF-7 cells.

940 (B) Transcription and dREG scores in the locus near the *CCND1* gene in B7<sup>TamS</sup> and  
941 G11<sup>TamR</sup> MCF-7 cells.

942 (C) Luciferase activity in B7<sup>TamS</sup> and G11<sup>TamR</sup> MCF-7 cells in the presence of an enhancer  
943 located approximately 300kb downstream of *CCND1*. All data normalized to renilla  
944 control. Data are represented as mean  $\pm$  SEM (n=3). \*\* p < 0.01, \*\*\*\* p < 0.0001.

945

946 **Figure S2: PRO-seq densities are unaffected after tamoxifen treatment**

947 (A-B) Density scatterplot showing the correlation of PRO-seq densities between tamoxifen  
948 treated and untreated B7<sup>TamS</sup> (A) and G11<sup>TamR</sup> (B) MCF-7 cells.

949

950 **Figure S3: GDNF induces fulvestrant resistance in TamS cells**

951 (A) Cell viability of B7<sup>TamS</sup> cells in the presence or absence of 10 ng/ml GDNF and/or 100  
952 mM fulvestrant for 4 days. Data are represented as mean  $\pm$  SEM (n=3). \*\* p < 0.005, \*\*\*\*  
953 p < 0.0001.

954

955 **Figure S4: RET ligand expression is low compared to RET and GFR $\alpha$ 1 receptors**

- 956 (A) Density scatterplot showing the relationship between *GFRA1* and *ESR1* expression  
957 levels in 1,177 primary breast cancer samples in the cancer genome atlas (TCGA).  
958 Pearson's  $R = 0.52$ ;  $p < 2.2e-16$ .
- 959 (B) Violin plots depicting the absolute normalized expression level of receptor-tyrosine  
960 kinase receptors and ligands in 1,177 primary breast cancer samples (TCGA). For each  
961 color, the pair of genes represents receptor (left) and ligand (right). Gray represents the  
962 *RET* gene which encodes the RET tyrosine kinase receptor required for signal  
963 transduction of all four RET ligands.
- 964 (C) Kaplan Meier (KM) plots of survival probability in a cohort of breast cancer patients with  
965 low (black) or high (red) *NRTN* or *ARTN* expression. Patients are split based on the  
966 upper quartile of RET ligand expression.

967

968 **Figure S5: Highly correlated transcriptional patterns in biological replicates across the**  
969 **time course**

- 970 (A) Density scatterplot showing global transcription levels between TamS (B7 and C11; top)  
971 or TamR (G11 and H9; bottom) MCF-7 cell lines at 0, 1, or 24 hours GDNF treatment.  
972 The Spearman's rank correlation ( $\rho$ ) values are shown for each plot.
- 973 (B) Heatmap shows Spearman's rank correlation of RNA polymerase abundance of TamS  
974 and TamR lines between the indicated samples. Sample order is determined by  
975 hierarchical clustering. Colorscales show 0, 1, or 24 hours of GDNF treatment (above)  
976 or TamS or TamR (right) as shown below the heatmap.
- 977 (C-D) Scatter plots depict transcriptional changes between TamS and TamR MCF-7 cells  
978 following 1 hour (C) or 24 hours (D) of GDNF treatment.

979

980 **Figure S6: GDNF causes decrease in *PGR* mRNA expression and ER $\alpha$  binding sites**

981 (A) *PGR* mRNA expression level in G11<sup>TamR</sup> cells after treatment without (water) or with 10  
982 ng/mL GDNF for 4 or 24 hrs. Data are represented as mean  $\pm$  SEM (n=3). \*\*\*\* p <  
983 0.0001.

984 (B) Motifs enriched in TREs that have different amounts of RNA polymerase before and  
985 after 24 hours of GDNF treatment.

986

987 **STAR METHODS**

988 Detailed methods are provided in the online version of this paper and include the following:

- 989 • KEY RESOURCES TABLE
- 990 • CONTACT FOR REAGENT AND RESOURCE SHARING
- 991 • EXPERIMENTAL MODEL AND SUBJECT DETAILS
- 992 • METHODS DETAILS
  - 993 ○ Cell Lines and Cell Culture
  - 994 ○ Cell Viability Assay
  - 995 ○ Cell Culture Set Up and Nuclei Isolation
  - 996 ○ Nuclear Run-on and PRO-seq Library Preparation
  - 997 ○ Mapping of PRO-seq Sequencing Reads
  - 998 ○ Identification of Active enhancers and Promoters Using dREG-HD
  - 999 ○ Differential Expression Analysis (DESeq2)
  - 1000 ○ Motif Enrichment Analysis
  - 1001 ○ TCGA Data Analysis
  - 1002 ○ Letrozole Microarray Reanalysis
  - 1003 ○ Pausing Analysis

- 1004           ○ Reconstructing Tamoxifen Resistance Regulatory Network
- 1005           ○ RNA Isolation and Quantitative Real-Time PCR
- 1006           ○ Generation of GDNF Knockdown G11 Cells
- 1007           ○ Cell Proliferation Assay
- 1008           ○ Immunoblot Analysis
- 1009           ● QUANTIFICATION AND STATITICAL ANALYSIS
- 1010           ● DATA AND SOFTWARE AVAILABILITY
- 1011

1 **STAR Methods**

2 **KEY RESOURCES TABLE**

| REAGENT or RESOURCE                                                 | SOURCE             | IDENTIFIER          |
|---------------------------------------------------------------------|--------------------|---------------------|
| <b>Antibodies</b>                                                   |                    |                     |
| anti-p-ERK                                                          | Cell Signaling     | Cat# 4695           |
| anti-ER $\alpha$                                                    | Santa Cruz         | Cat# sc-543         |
| anti-p-ER                                                           | Cell Signaling     | Cat# 2511           |
| <b>Chemicals, Peptides, and Recombinant Proteins</b>                |                    |                     |
| (Z)-4-Hydroxytamoxifen (4-OHT)                                      | Sigma-Aldrich      | Cat# H7904          |
| Fulvestrant                                                         | Sigma-Aldrich      | Cat# I4409          |
| Recombinant human GDNF                                              | PeproTech          | Cat# 450-10         |
| SUPERase In RNase Inhibitor (20 U/L)                                | Life Technologies  | Cat# AM2694         |
| Protease Inhibitor Cocktail                                         | Roche              | Cat# 11836153001    |
| Biotin-11-ATP                                                       | PerkinElmer        | Cat#<br>NEL544001EA |
| Biotin-11-GTP                                                       | PerkinElmer        | Cat#<br>NEL545001EA |
| Biotin-11-CTP                                                       | PerkinElmer        | Cat#<br>NEL542001EA |
| Biotin-11-UTP                                                       | PerkinElmer        | Cat#<br>NEL543001EA |
| Sarkosyl                                                            | Fisher Scientific  | Cat# AC612075000    |
| Trizol                                                              | Life Technologies  | Cat# 15596-026      |
| Trizol LS                                                           | Life Technologies  | Cat# 10296-010      |
| GlycoBlue                                                           | Ambion             | Cat# AM9515         |
| Hydrophilic streptavidin magnetic beads                             | NEB                | Cat# S1421S         |
| RppH                                                                | NEB                | Cat# M0356S         |
| T4 RNA Ligase 1                                                     | NEB                | Cat# M0204L         |
| <b>Critical Commercial Assays</b>                                   |                    |                     |
| RNeasy Kit                                                          | Qiagen             | Cat# 74104          |
| High Capacity RNA-to-cDNA                                           | Applied Biosystems | Cat# 4387406        |
| Power SYBR Green PCR Master Mix                                     | Applied Biosystems | Cat# 4367659        |
| <b>Deposited Data</b>                                               |                    |                     |
| All genomic data was deposited in GEO and the sequence read archive | Herein             | GSE93229            |
|                                                                     |                    |                     |
|                                                                     |                    |                     |

|                                                              |                                          |                                                                                                 |
|--------------------------------------------------------------|------------------------------------------|-------------------------------------------------------------------------------------------------|
|                                                              |                                          |                                                                                                 |
|                                                              |                                          |                                                                                                 |
| <b>Experimental Models: Cell Lines</b>                       |                                          |                                                                                                 |
| MCF7-B7 <sup>TamS</sup>                                      | (Gonzalez-Malerva et al., 2011)          | N/A                                                                                             |
| MCF7-C11 <sup>TamS</sup>                                     | (Gonzalez-Malerva et al., 2011)          | N/A                                                                                             |
| MCF7-G11 <sup>TamR</sup>                                     | (Gonzalez-Malerva et al., 2011)          | N/A                                                                                             |
| MCF7-H9 <sup>TamR</sup>                                      | (Gonzalez-Malerva et al., 2011)          | N/A                                                                                             |
| <b>Recombinant DNA</b>                                       |                                          |                                                                                                 |
| Plasmid for control shRNA                                    | Sigma-Aldrich                            | Cat# SHC002                                                                                     |
| Plasmid for <i>GDNF</i> shRNA                                | Sigma-Aldrich                            | Cat# SHCLND-NM_000514                                                                           |
| pLKO.1 shRNA plasmid                                         | Addgene                                  | Plasmid #1864                                                                                   |
| psPAX2 packaging plasmid                                     | Addgene                                  | Plasmid #12260                                                                                  |
| pMD2.G envelope plasmid                                      | Addgene                                  | Plasmid #12259                                                                                  |
| <b>Sequence-Based Reagents</b>                               |                                          |                                                                                                 |
| Primers for <i>ACTB</i> , see STAR Methods                   | This paper                               | N/A                                                                                             |
| Primers for <i>PGR</i> , see STAR Methods                    | This paper                               | N/A                                                                                             |
| Primers for <i>GREB1</i> , see STAR Methods                  | This paper                               | N/A                                                                                             |
| Primers for <i>ESR1</i> , see STAR Methods                   | This paper                               | N/A                                                                                             |
| Primers for <i>GDNF</i> , see STAR Methods                   | Boulay et al., 2008                      | N/A                                                                                             |
| Primers for <i>EGR1</i> , see STAR Methods                   | Fang et al., 2016                        | N/A                                                                                             |
| <b>Software and Algorithms</b>                               |                                          |                                                                                                 |
| cutadapt                                                     | Martin, 2011                             |                                                                                                 |
| dREG                                                         | Danko et al., 2015                       | <a href="https://github.com/Danko-Lab/dREG">https://github.com/Danko-Lab/dREG</a>               |
| dREG-HD                                                      | Manuscript in preparation;<br>This paper | <a href="https://github.com/Danko-Lab/dREG.HD">https://github.com/Danko-Lab/dREG.HD</a> ;       |
| bigWig software package                                      |                                          | <a href="https://github.com/andreilmartins/bigWig">https://github.com/andreilmartins/bigWig</a> |
| Visualization using R                                        | Team, 2010                               |                                                                                                 |
| BedTools                                                     | Quinlan and Hall, 2010                   |                                                                                                 |
| bedGraphToBigWig program in the Kent Source software package | Kuhn et al., 2013                        |                                                                                                 |
| DEseq2                                                       | Love et al., 2014                        |                                                                                                 |

|                            |                      |  |
|----------------------------|----------------------|--|
| RTFBSDB                    | Wang et al., 2016    |  |
| Cytoscape software package | Shannon et al., 2003 |  |
| GraphPad Prism             |                      |  |

3

#### 4 **CONTACT FOR REAGENT AND RESOURCE SHARING**

5 Charles G. Danko, Ph.D.  
6 Baker Institute for Animal Health  
7 Cornell University  
8 Hungerford Hill Rd.  
9 Ithaca, NY 14853, USA  
10 Phone: (607) 256-5620  
11 E-mail: dankoc@gmail.com

12

#### 13 **EXPERIMENTAL MODEL AND SUBJECT DETAILS**

##### 14 **Cell Lines and Cell Culture**

15 Tamoxifen sensitive (TamS; B7<sup>TamS</sup> and C11<sup>TamS</sup>) and resistant (TamR; G11<sup>TamR</sup> and  
16 H9<sup>TamR</sup>) MCF-7 cells (Gonzalez-Malerva et al., 2011) were a gift from Dr. Joshua LaBaer. TamS  
17 cells were grown in Dulbecco's Modified Eagle Medium supplemented with 5% fetal bovine  
18 serum and 1% Penicillin Streptomycin, and TamR cells were grown in the same media  
19 supplemented with 1  $\mu$ M tamoxifen. Tamoxifen used throughout in this paper is (Z)-4-  
20 Hydroxytamoxifen (4-OHT; Sigma-Aldrich; Cat# H7904).

21

#### 22 **METHODS DETAILS**

##### 23 **Cell Viability Assay**

24 Briefly,  $5 \times 10^3$  TamS and TamR cells were grown in 24-well TC-treated plates in their  
25 specific culture media. After letting the cells adhere to the plate for 24 hours, cells were rinsed  
26 with PBS three times to remove any residual tamoxifen. The cells were treated with either  
27 increasing dosage of tamoxifen (0 (vehicle control; EtOH),  $10^{-11}$ ,  $10^{-10}$ ,  $10^{-9}$ ,  $10^{-8}$ , or  $10^{-7}$  M) or

28 fulvestrant (Sigma-Aldrich; Cat# I4409) (0 (vehicle control; DMSO),  $10^{-11}$ ,  $10^{-10}$ ,  $10^{-9}$ ,  $10^{-8}$ , or  $10^{-7}$   
29 M).

30 For setting up the rescue experiment with GDNF (PeproTech; Cat# 450-10),  $5 \times 10^3$   
31 B7<sup>TamS</sup> cells were grown in 24-well TC-treated plates in their specific culture media. After letting  
32 the cells adhere to the plate for 24 hours, cells were treated with either EtOH (vehicle),  $10^{-7}$  M  
33 tamoxifen,  $10^{-7}$  M tamoxifen and 10 ng/mL GDNF, or 10 ng/mL GDNF treatment. The same set  
34 up was performed for  $10^{-7}$  M treatment of fulvestrant and using DMSO (vehicle) as a control.

35 After four days of endocrine treatment cells were fixed with 4% paraformaldehyde and  
36 stained with 0.5% crystal violet solution made in 25% methanol. After washing away non-  
37 specific crystal violet stain with PBS, we took pictures of each plate and the crystal violet stain  
38 from the fixed-cells was removed using 10% acetic acid. The absorbance was measured using  
39 the Tecan plate reader at OD<sub>595nm</sub>. Samples were normalized to the untreated control. Three  
40 biological replicates were performed and data are represented as mean  $\pm$  SEM.

41

## 42 **Cell Culture Set Up and Nuclei Isolation**

43 TamS and TamR lines were grown in 150mm TC-treated culture dish in their respective  
44 normal culture media. Cells were rinsed with PBS for at least three times 24 hours after plating.  
45 Both the TamS and TamR cells were grown in Dulbecco's Modified Eagle Medium  
46 supplemented with 5% fetal bovine serum and 1% Penicillin Streptomycin for an additional three  
47 days until ~80% confluency in the absence of tamoxifen, in order to measure the difference  
48 between TamS and TamR cells pre-treatment. For estrogen (E2) and tamoxifen treated TamS  
49 and TamR cells, cells were instead grown in phenol-red free Dulbecco's Modified Eagle Medium  
50 supplemented with 5% charcoal-stripped fetal bovine serum and 1% Penicillin Streptomycin for  
51 three days. The cells were then treated with either EtOH (vehicle control), 100 nM E2, or with 1  
52  $\mu$ M tamoxifen for 40 min. For GDNF treated TamS and TamR cells, the same experimental set



53 up as the pre-treatment was performed. In addition, the cells were treated with 10 ng/mL GDNF  
54 for 0, 1, or 24 hours.

55 Nuclei were isolated as described in previously (Core et al., 2008). Briefly, cells were  
56 rinsed three times with ice-cold PBS and lysed using lysis buffer (10 mM Tris-HCl pH 7.4, 2 mM  
57 MgCl<sub>2</sub>, 3 mM CaCl<sub>2</sub>, 0.5% NP-40, 10% Glycerol, 1 mM DTT, 1X PIC (Roche; Cat#  
58 11836153001), and 1 μl/10 mL SUPERase-In (ThermoFisher; Cat# AM2694) dissolved in DEPC  
59 water). Cells were homogenized by gently pipetting at least 30 times and the nuclei were  
60 harvested by centrifugation at 1000g for five minutes at 4°C. The isolated nuclei were washed  
61 twice with lysis buffer and were resuspended in 100 μL freezing buffer (50 mM Tris HCl pH 8.3,  
62 5 mM MgCl<sub>2</sub>, 40% Glycerol, 0.1 mM EDTA pH 8.0, and 4 U/mL SUPERase-In). The isolated  
63 nuclei were used for nuclear run-on and precision nuclear run-on sequencing (PRO-seq) library  
64 preparation.

65

## 66 **Nuclear Run-on and PRO-seq Library Preparation**

67 Nuclear run-on experiments were performed according to the methods described  
68 previously by (Kwak et al., 2013; Mahat et al., 2016a).  $1 \times 10^7$  nuclei in 100 μL freezing buffer  
69 were mixed with 100 μL of 2x nuclear run-on buffer (10 mM Tris-HCl pH 8.0, 5 mM MgCl<sub>2</sub>, 1  
70 mM DTT, 300 mM KCl, 50 μM biotin-11-ATP (Perkin Elmer; Cat# NEL544001EA), 50 μM biotin-  
71 11-GTP (Perkin Elmer; Cat# NEL545001EA), 50 μM biotin-11-CTP (Perkin Elmer Cat#  
72 NEL542001EA), 50 μM biotin-11-UTP (Perkin Elmer; Cat# NEL543001EA), 0.4 units/μL  
73 SUPERase In RNase Inhibitor (Life Technologies; Cat# AM2694), 1% Sarkosyl (Fisher  
74 Scientific; Cat# AC612075000). The mixture was incubated at 37 °C for five minutes. The biotin  
75 run-on reaction is stopped using Trizol (Life Technologies; Cat# 15596-026), Trizol LS (Life  
76 Technologies; Cat# 10296-010) and pelleted. The use of GlycoBlue (Ambion; Cat# AM9515) is  
77 recommended for higher pellet yield. RNA pellets were re-dissolved in DEPC water and

78 denatured in 65 °C for 40 seconds and hydrolyzed in 0.2 N NaOH on ice for 10 minutes to have  
79 a hydrolyzed RNA length with that range ideally of 40 to 100 nts. Bead binding (NEB; Cat#  
80 S1421S) is performed to pull down nascent RNAs followed by 3' RNA adaptor ligation (NEB;  
81 Cat# M0204L). Another bead binding is performed followed by 5' de-capping using RppH (NEB;  
82 Cat# M0356S). 5' phosphorylation is performed followed by 5' adaptor ligation. The last bead  
83 binding is performed before generation of cDNA by reverse transcription. PRO-seq libraries  
84 were prepared according to manufacturers' protocol (Illumina) and were sequenced using the  
85 Illumina NextSeq500 sequencing.

86

### 87 **Mapping of PRO-seq Sequencing Reads**

88 PRO-seq reads failing Illumina quality filters were removed. Adapters were trimmed from  
89 the 3' end of remaining reads using cutadapt with a 10% error rate (Martin, 2011). Reads were  
90 mapped with BWA (Li and Durbin, 2009) to the human reference genome (hg19) and a single  
91 copy of the Pol I ribosomal RNA transcription unit (GenBank ID# U13369.1). The location of the  
92 RNA polymerase active site was represented by a single base which denotes the 3' end of the  
93 nascent RNA, which corresponds to the position on the 5' end of each sequenced read. Mapped  
94 reads were normalized to reads per kilobase per million mapped (RPKM) and converted to  
95 bigWig format using BedTools (Quinlan and Hall, 2010) and the bedGraphToBigWig program in  
96 the Kent Source software package (Kuhn et al., 2013). Downstream data analysis was  
97 performed using the bigWig software package, available from:  
98 <https://github.com/andreilmartins/bigWig>. All data processing and visualization was done in the R  
99 statistical environment (Team, 2010).

100

### 101 **Identification of Active Enhancers and Promoters using dREG-HD**

102 We identified TREs using dREG (Danko et al., 2015). Data collected from all four cell  
103 lines (TamR and TamS MCF-7 cells) or between different time points (GDNF treatment) was  
104 combined to increase statistical power for the discovery of a superset of TREs active during any  
105 of the conditions examined.

106 The precise coordinates of TREs were refined using a strategy that we call dREG-HD  
107 (available at <https://github.com/Danko-Lab/dREG.HD>; manuscript in preparation). Briefly,  
108 dREG-HD uses an epsilon-support vector regression (SVR) with a Gaussian kernel to map the  
109 distribution of PRO-seq reads to DNase-I signal intensities. Training was conducted on  
110 randomly chosen positions within dREG peaks in K562 cells (GEO ID# GSM1480327) extended  
111 by 200bp on either side. We selected the optimal set of features based on maximizing the  
112 Pearson correlation coefficient between the imputed and experimental DNase-I signal intensity  
113 over an independent validation set. Before DNase-I imputation, PRO-seq data was  
114 preprocessed by normalizing read counts to the sequencing depth and scaled such that the  
115 maximum value is within the 90 percentile of the training examples. To identify peaks, we  
116 smoothed the imputed DNase-I signal using a cubic spline and identified local maxima. We  
117 tuned the performance of the peak calling by empirically optimizing two free parameters that  
118 control the (1) smoothness of spline curve fitting, and (2) a threshold level on the intensity of the  
119 imputed DNase-I signal. Parameters were optimized to achieve <10% false discovery rates on a  
120 K562 training dataset by a grid optimization over free parameters. We tested the optimized  
121 dREG-HD model (including both DNase-I imputation and peak calling) a GRO-seq dataset  
122 completely held out from model training and parameter optimization in on GM12878  
123 lymphoblastoid cell lines (GSM1480326). Testing verified that dREG-HD identified transcribed  
124 DNase-I hypersensitive sites with 82% sensitivity at a 10% false discovery rate.

125 Additional genomic data in MCF-7 cells generated by the ENCODE project was  
126 downloaded from Gene Expression Omnibus. TREs discovered using dREG-HD were

127 compared with ChIP-seq for H3K27ac and H3K4me3 (accession numbers: GSM945854 and  
128 GSM945269) and DNase-1 hypersensitivity (GSM945854).

129

## 130 **Differential Expression Analysis (DESeq2)**

131 We compared between treatment conditions or cell lines using gene annotations  
132 (GENCODE v19). We counted reads in the interval between 1,000 bp downstream of the  
133 annotated transcription start site to the end of the gene for comparisons between TamS and  
134 TamR cell clones. When comparing gene expression between GDNF treated and untreated  
135 MCF-7 cells we counted reads in the window between 1,000 bp downstream of the transcription  
136 start site and the end of the annotation or 60,000 bp into the gene body (whichever was  
137 shorter). This window was selected to avoid (1) counting reads in the pause peak near the  
138 transcription start site, and (2) to focus on the 5' end of the gene body affected by changes in  
139 transcription during 60 minutes of GDNF treatment assuming a median elongation rate of 2 kb/  
140 minute. We limited analyses to gene annotations longer than 2,000 bp in length. To quantify  
141 transcription at enhancers, we counted reads on both strands in the window covered by each  
142 dREG-HD site. Differential expression analysis was conducted using deSeq2 (Love et al., 2014)  
143 and differentially expressed genes were defined as those with a false discovery rate (FDR) less  
144 than 0.01.

145

## 146 **Motif Enrichment Analysis**

147 Motif enrichment analyses were completed using the default set of 1,964 human motifs  
148 in RTFBSDB (Wang et al., 2016) clustered into 622 maximally distinct DNA binding specificities  
149 (see ref Wang et. al. (2016)). We selected the motif to represent each cluster whose canonical  
150 transcription factor is most highly transcribed in MCF-7 cells. We fixed the motif cutoff log odds  
151 ratio of 7.5 (log e) in a sequence compared with a third-order Markov model as background. We

152 identified motifs enriched in dREG-HD TREs that change transcription abundance between two  
153 conditions using Fisher's exact test with a Bonferroni correction for multiple hypothesis testing.  
154 TREs were compared to a background set of >1,500 GC-content matched TREs that do not  
155 change transcription levels (<0.25 absolute difference in magnitude (log-2 scale) and  $p > 0.2$ )  
156 using the enrichmentTest function in RTFBSDB (Wang et al., 2016).

157

## 158 **TCGA Data Analysis**

159 Processed and normalized breast cancer RNA-seq data was downloaded from the  
160 International Cancer Genome Consortium (ICGC) data portal website (<https://dcc.icgc.org>).  
161 Data profiling each gene was extracted using shell scripts. Processing and visualization was  
162 done in R.

163

## 164 **Letrozole Microarray Reanalysis**

165 We reanalyzed Affymetrix U133A microarray data profiling mammary tumor biopsies  
166 before and after treatment with letrozole (Miller et al., 2012). Miller et. al. (2012) collected data  
167 from mammary tumor biopsies prior to letrozole treatment, 10-14 days following the start of  
168 treatment, and 90 days following the start of treatment. Samples were annotated as a  
169 "responder" (i.e., responds to letrozole treatment), a "non-responder" (i.e., no benefit from  
170 letrozole treatment), or "not assessable" (i.e., unknown). The Series Matrix Files were  
171 downloaded from Gene Expression Omnibus (GSE20181) and each gene of interest was  
172 extracted and processed into a text file. We used the following Affymetrix ID numbers  
173 221359\_at, 210683\_at, 210237\_at, 221373\_x\_at, 211421\_s\_at, and 201694\_s\_at to represent  
174 *GDNF*, *NRTN*, *ARTN*, *PSPN*, *RET*, and *EGR1*, respectively. We found no evidence of  
175 differences in RET or RET ligand expression across the three time points, and we therefore  
176 used the average expression of each RET ligand in each sample when comparing between  
177 responsive and non-responsive patients in order to decrease assay noise.

178           Outlier scores were designed to score the degree to which each sample falls within the  
179 tail of the distribution representing high expression levels of each RET ligand (as shown in **Fig.**  
180 **4E**). Because endocrine resistance could, in principal, be caused either by high expression of  
181 any individual RET ligand on its own, or by moderately high expression of multiple RET ligands  
182 in combination, we devised a data transformation and sum approach to score the degree to  
183 which all four of the RET ligands were highly expressed in each sample. In our data  
184 transformation, expression levels were centered by the median value and scaled based on the  
185 lower tail of the expression distribution (between quartile 0 and 50). This approach is similar in  
186 concept to a Z-score transform, but uses the lower tail to estimate the variance in order to avoid  
187 having high expression levels, which we hypothesize here may contribute to endocrine  
188 resistance, from contributing to the denominator used to standardize the distribution of each  
189 RET ligand. After transforming scores from all four RET ligands separately, we took the sum of  
190 the scores to represent our final 'outlier score'. Because our hypothesis specifically predicted an  
191 increase in the RET ligand score to correlate with letrozole resistance, and because the number  
192 of patients was small, we designed the analysis to use a one-tailed Wilcoxon rank sum test.  
193 However, in practice using a two-tailed Wilcoxon rank sum test did not change the results of our  
194 analysis. Data was processed and visualization was completed using R.

195

## 196 **Pausing Analysis**

197           Pause and gene body densities were quantile normalized across all GDNF time course  
198 PRO-seq data before pausing analysis in order to avoid potential unknown confounding effects,  
199 as described by Danko et. al. (2013). Pausing indices were defined as the ratio of quantile  
200 normalized RNA polymerase densities in 500 bp centered on the annotated GENCODE (v19)  
201 transcription start sites and the gene body (+1kb to +60kb, as defined above). In the pausing  
202 analysis we compared the log<sub>e</sub> transformed ratio of pausing indices between 1 hour of GDNF

203 and untreated TamS MCF-7 cells. All computations were performed using the R statistical  
204 package.

205

## 206 **Reconstructing Tamoxifen Resistance Regulatory Network**

207 We defined direct targets of E2 and GDNF signaling as all of those genes undergoing  
208 transcriptional changes following short durations of ligand treatment (<40-60 minutes). We used  
209 existing GRO-seq data following 40 minutes of E2 treatment (GSE27463). Data following GDNF  
210 treatment were collected during the course of this study. Secondary targets were defined as  
211 transcriptional changes following 24 hours of GDNF treatment. Secondary targets were  
212 assigned to transcription factors (TFs) with binding sites located nearby (<50 kb from the  
213 transcription start site) genes that changed following 1 or 24 hours of GDNF. Binding sites were  
214 derived from ENCODE CHIP-seq data in MCF-7 cells using BroadPeak peak calls for CEBP,  
215 EGR1, ELF1, FOSL2, FOXM1, GABPA, GATA3, JUND, MAX, NR2F2, NRSF, PML, SRF,  
216 TAF1, TCF12, and TEAD4. Data for each TF was downloaded from the ENCODE DCC  
217 (<http://hgdownload.cse.ucsc.edu/goldenPath/hg19/encodeDCC/wgEncodeHaibTfbs/>). Networks  
218 were visualized using the Cytoscape software package (Shannon et al., 2003).

219

## 220 **RNA Isolation and Quantitative Real-Time PCR**

221 RNA was purified using RNeasy Kit (Qiagen; Cat# 74104) and 1µg of purified RNA was  
222 reverse-transcribed using High Capacity RNA-to-cDNA kit (Applied Biosystems; Cat# 4387406)  
223 according to the manufacturers' protocols. Real-time quantitative PCR analysis was performed  
224 using the following primers: *ACTB* Forward (5'-CCAACCGCGAGAAGATGA-3') and Reverse  
225 (5'- CCAGAGGCGTACAGGGATAG-3'); *PGR* Forward (5'-GTCAGGCTGGCATGGTCCTT-3')  
226 and Reverse (5'-GCTGTGGGAGAGCAACAGCA-3'); *GREB1* Forward (5'-  
227 GTGGTAGCCGAGTGGACAAT-3') and Reverse (5'-ATTTGTTTCCAGCCCTCCTT-3') (Prenzel  
228 et al., 2011); *ESR1* Forward (5'- TTACTIONGACCAACCTGGCAGA-3') and Reverse (5'-

229 ATCATGGAGGGTCAAATCCA-3'); *GDNF* Forward (5'- TCTGGGCTATGAAACCAAGGA-3')  
230 and Reverse (5'- GTCTCAGCTGCATCGCAAGA-3') (Boulay et al., 2008); *EGR1* (5'-  
231 AGCCCTACGAGCACCTGAC-3') and Reverse (5'- GTTTGGCTGGGGTAACTGGT-3') (Fang et  
232 al., 2016); and Power SYBR Green PCR Master Mix (Applied Biosystems; Cat#4367659). The  
233 samples were normalized to  $\beta$ -actin. At least three biological replicates were performed and  
234 data are represented as mean  $\pm$  SEM. All statistical analysis for qPCR were performed using  
235 GraphPad Prism. Groups were compared using two-tailed unpaired Student's t-test.

236

### 237 **Generation of GDNF Knockdown G11 Cells**

238 *GDNF* expression was stably knocked down in G11<sup>TamR</sup> cells by transduction with  
239 lentivirus expressing either shRNA scrambled control or *GDNF* shRNA. Mission shRNA  
240 lentivirus plasmids for control shRNA (Cat# SHC002) and *GDNF* shRNA (Cat# SHCLND-  
241 NM\_000514) from Sigma-Aldrich were used. Specifically, 1.5  $\mu$ g pLKO.1 shRNA plasmid  
242 (Addgene; Plasmid #1864), 0.5  $\mu$ g psPAX2 packaging plasmid (Addgene; Plasmid #12260),  
243 and 0.25  $\mu$ g pMD2.G envelope plasmid were used for packaging (Addgene; Plasmid #12259).  
244 The lentiviruses were generated and transduced according to the manufacturer's instructions  
245 (Sigma-Aldrich). Clones were selected in 2  $\mu$ g/ml of puromycin.

246

### 247 **Cell Proliferation Assay**

248 Approximately  $1 \times 10^6$  G11-scrambled (G11-SCR) and G11-GDNF-knockdown (G11-  
249 GDNF-KD) cells were plated in T25 TC-flask. The cells were grown in either 0, 1 or 10  $\mu$ M  
250 tamoxifen in the presence or absence of 5 ng/mL GDNF for 7 days. The cell number was  
251 counted for quantification and was normalized to the untreated group. Three biological  
252 replicates were performed.



253

## 254 **Immunoblot Analysis**

255 Whole cell lysates were resolved by SDS-PAGE followed by transfer to PVDF membrane. The  
256 membranes were stained with Ponceau to visualize the total bound-protein. The membranes  
257 were incubated overnight with primary antibodies diluted in TBST in 4 °C using the following  
258 antibody concentrations: anti-p-ERK (1:1000; Cell Signaling; Cat# 4695), anti-ER $\alpha$  (1:1000;  
259 Santa Cruz; Cat# sc-543) and anti-p-ER (1:1000; Cell Signaling; Cat# 2511). The primary  
260 antibodies were detected with HRP-conjugated secondary antibodies and were exposed to ECL  
261 reagents.

262

## 263 **QUANTIFICATION AND STATISTICAL ANALYSIS**

264 Statistical parameters include the exact number of biological replicates (n), standard error of the  
265 mean (mean  $\pm$  SEM), and statistical significance are reported in the Figure legends. Data are  
266 reported statistically significant when  $p < 0.05$  by two-tailed Student's t-test. In figures, asterisks  
267 and pound signs denote statistical significance as calculated by Student's t-test. Specific p-  
268 values are indicated in the Figure legends. Statistical analysis was performed using GraphPad  
269 PRISM 6.

270

## 271 **DATA AND SOFTWARE AVAILABILITY**

### 272 **Data Resources**

273 Raw data files for the PRO-seq analysis have been deposited in Gene Expression Omnibus  
274 under Accession Number GSE93229.

275

### 276 **Software Availability**

277 Software and scripts used in all analyses are publicly available without restriction on GitHub at

278 <https://github.com/Danko-Lab/mcf7tamres>. At the time of submission, the most recent commit  
279 was version number: 855156ad07c042c88089cb4f31bf9d544487a1b2.

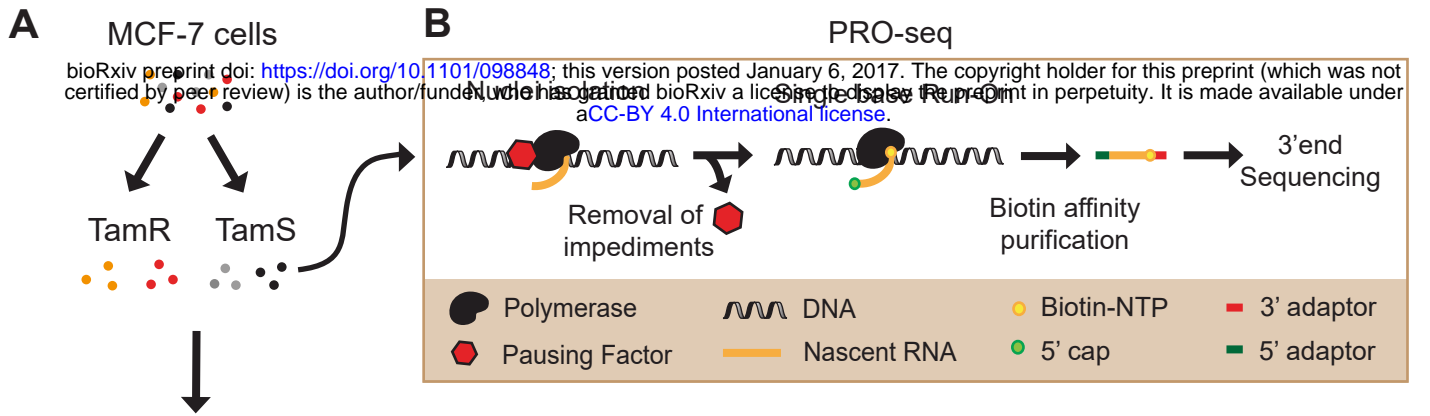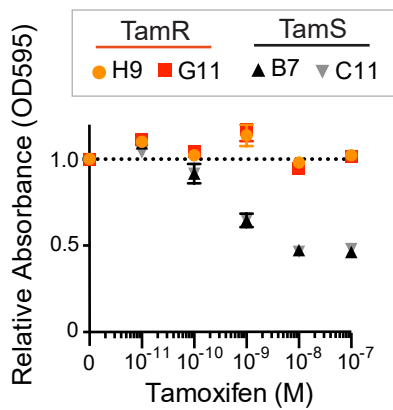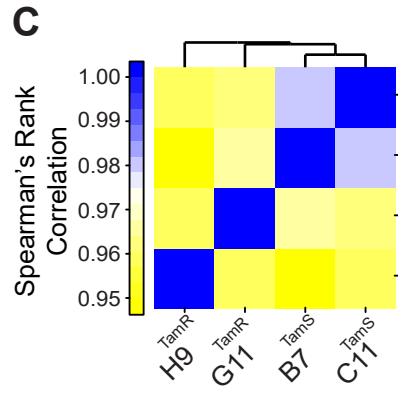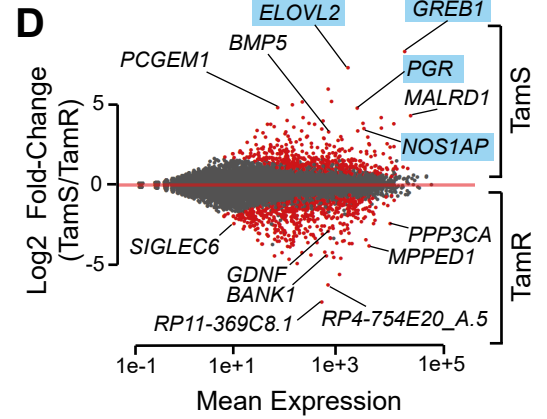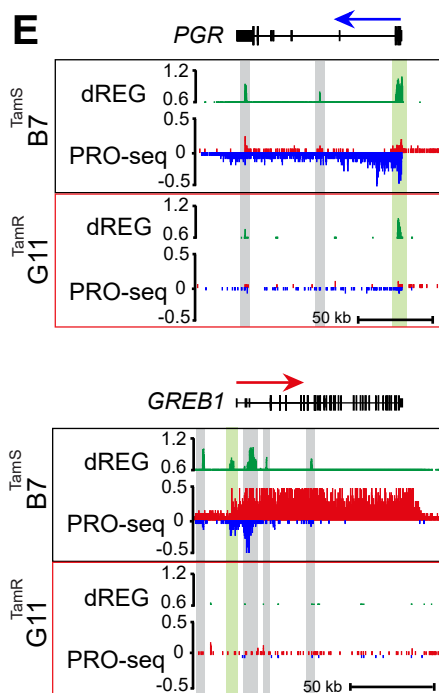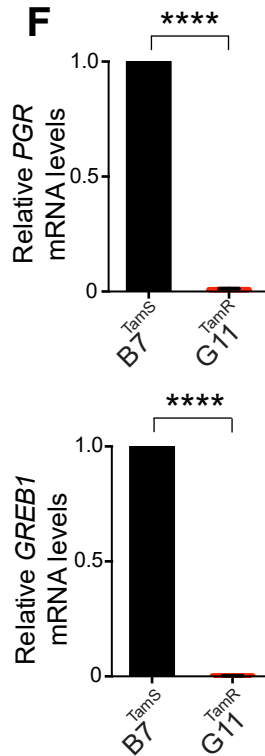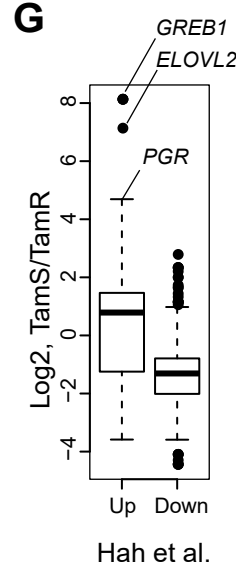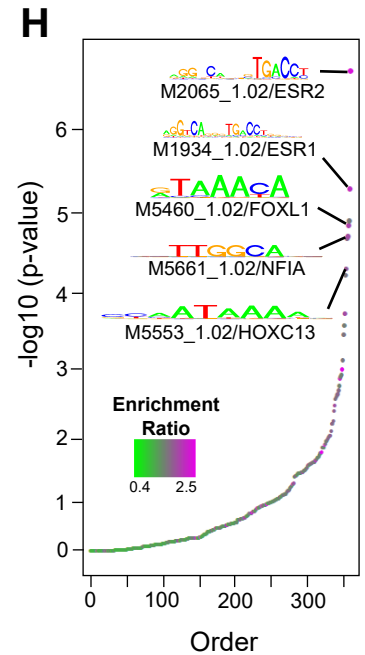

**Figure 1: ER target genes are uniquely expressed in TamS cells.**

- (A) Cell viability of tamoxifen sensitive (TamS; B7<sup>TamS</sup> and C11<sup>TamS</sup>) and resistant (TamR; G11<sup>TamR</sup> and H9<sup>TamR</sup>) MCF-7 cells upon treatment with 0 (vehicle; EtOH),  $10^{-11}$ ,  $10^{-10}$ ,  $10^{-9}$ ,  $10^{-8}$ , or  $10^{-7}$  M of tamoxifen for 4 days. Data are represented as mean  $\pm$  SEM (n=3).
- (B) Experimental setup for PRO-seq. PRO-seq libraries were prepared from all four cell lines grown in the absence of tamoxifen for 3 days.
- (C) Spearman's rank correlation of RNA polymerase abundance in the gene bodies (+1000 bp to the annotation end) of TamS and TamR cell lines.
- (D) MA plot showing significantly changed genes (red) that are higher in TamS (top) or TamR (bottom) MCF-7 lines. Genes highlighted in the plots which are ER $\alpha$  targets are highlighted in blue.
- (E) Transcription near the *PGR* and *GREB1* loci in B7<sup>TamS</sup> and G11<sup>TamR</sup> cells. PRO-seq densities on the sense and anti-sense strand are shown in red and blue, respectively. dREG scores are shown in green. Enhancers and promoters are shown in grey and light green shading, respectively. Arrows indicate the direction of gene annotations.
- (F) *PGR* and *GREB1* mRNA expression levels in B7<sup>TamS</sup> and G11<sup>TamR</sup> cells. Data are represented as mean  $\pm$  SEM (n=3 for *PGR*; n = 4 for *GREB1*). \*\*\*\* p < 0.0001. G11<sup>TamR</sup> is normalized to B7<sup>TamS</sup>.
- (G) Boxplots represent fold-change between TamS and TamR of genes that are either up- or down-regulated following 40 minutes of estrogen (E2) in Hah et. al. (2011). Spearman's Rho= 0.185, p < 2.2e-16.
- (H) Motifs enriched in TREs that have different amounts of RNA polymerase between TamS and TamR cells compared with TREs that have consistent levels.

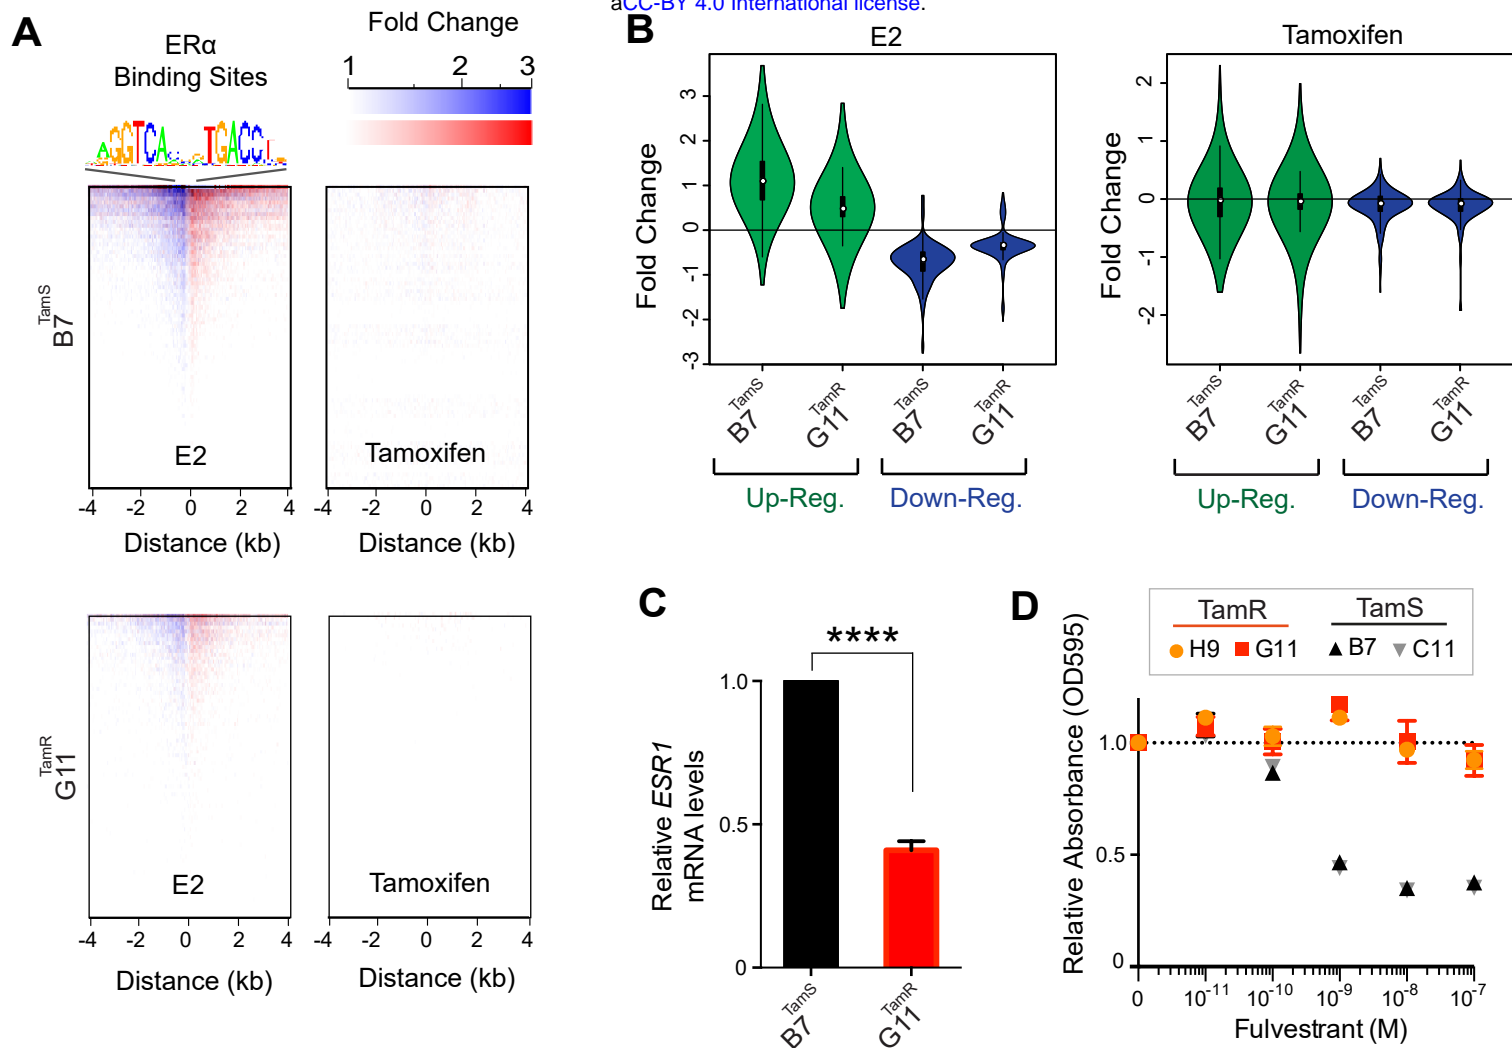

**Figure 2: Tamoxifen resistant lines have functional ER $\alpha$  signaling**

- (A) Heatmap of changes in RNA polymerase abundance following 40 minutes of E2 or tamoxifen treatment near ER $\alpha$  binding sites in B7<sup>TamS</sup> and G11<sup>TamR</sup> cells.
- (B) Violin plots show fold changes in the indicated MCF-7 clone following 40 minutes of E2 or tamoxifen treatment at genes up- or down-regulated by E2 in Hah et al. (2011). Up- and down-regulated genes are in green and blue, respectively.
- (C) *ESR1* mRNA expression levels in B7<sup>TamS</sup> and G11<sup>TamR</sup> cells. Data are represented as mean  $\pm$  SEM (n=3). \*\*\*\* p < 0.0001.
- (D) Cell viability of TamS and TamR cells upon treatment with 0 (vehicle; DMSO), 10<sup>-11</sup>, 10<sup>-10</sup>, 10<sup>-9</sup>, 10<sup>-8</sup>, or 10<sup>-7</sup> M fulvestrant (ER degrader) for 4 days. Data are represented as mean  $\pm$  SEM (n=3).

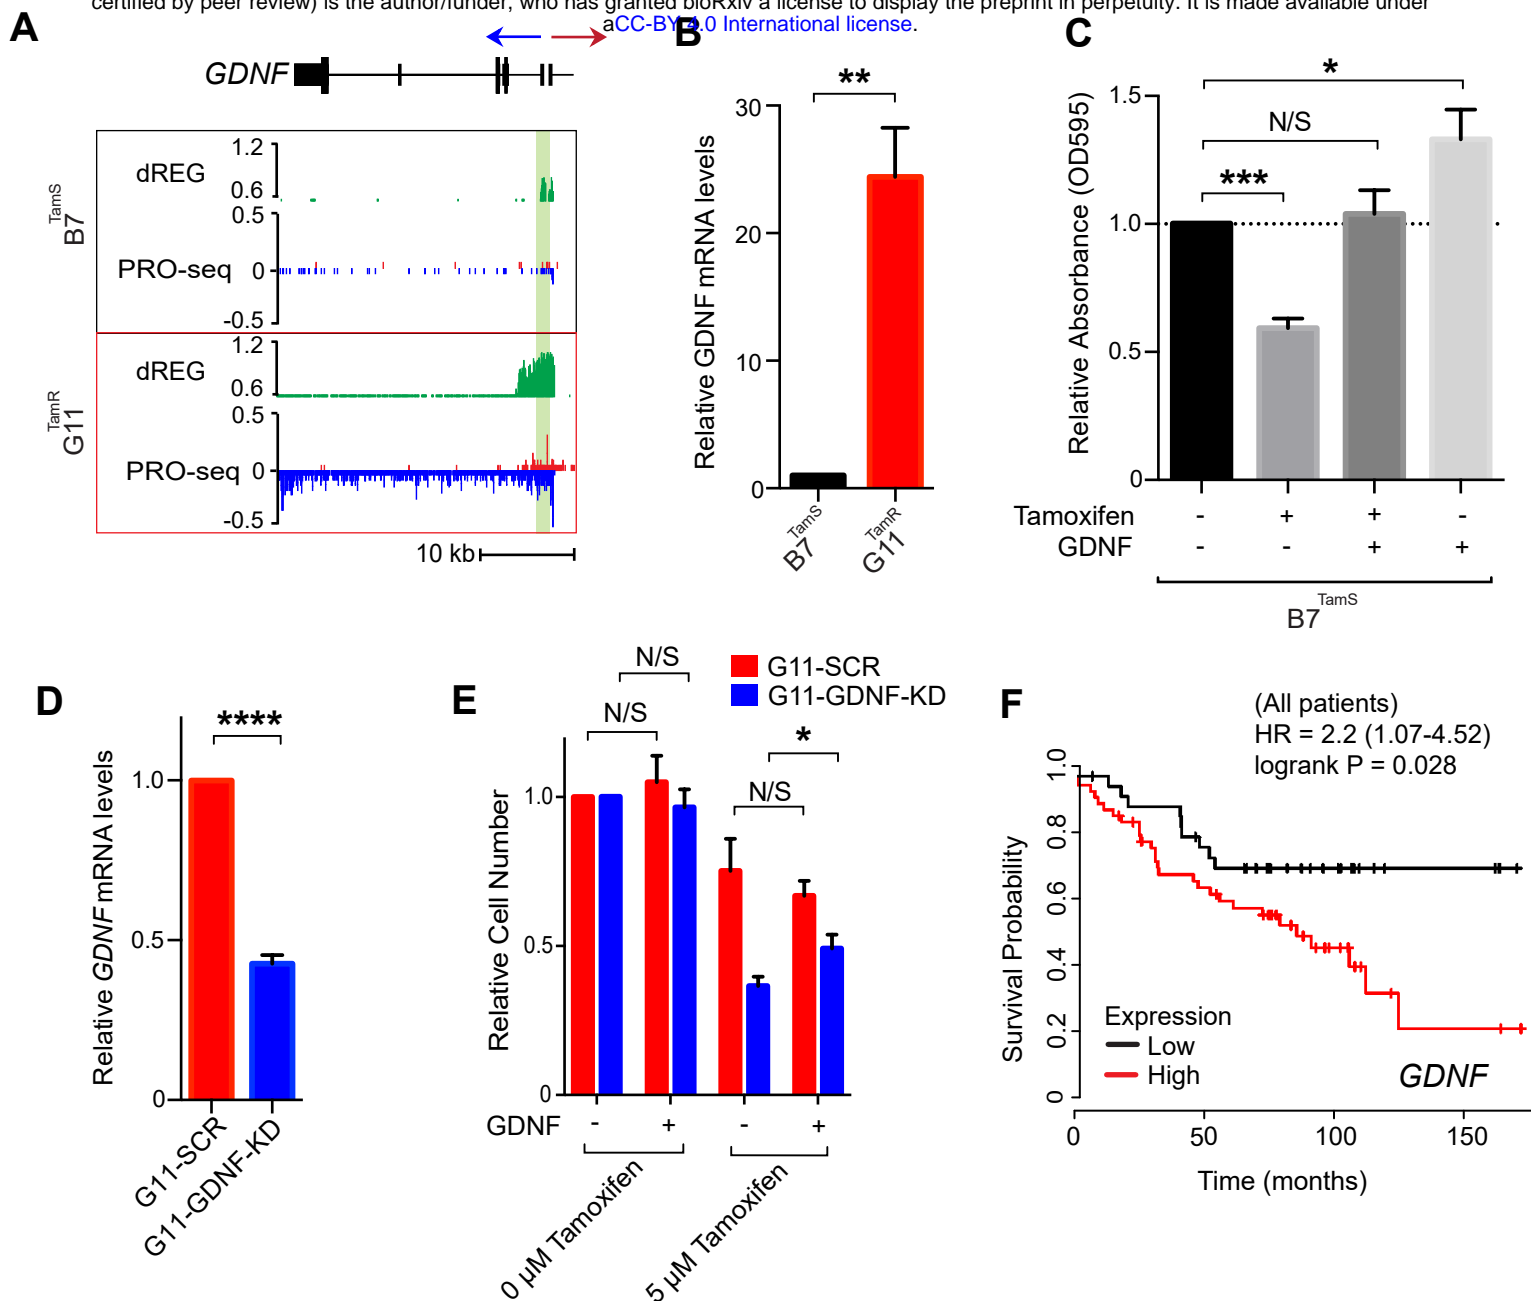

**Figure 3: *GDNF* is responsible for tamoxifen resistance in MCF-7 cells**

- (A) Transcription near the *GDNF* locus in B7<sup>TamS</sup> and G11<sup>TamR</sup> cells. PRO-seq densities on sense strand and anti-sense strand are shown in red and blue, respectively. dREG scores are shown in green. The region near the *GDNF* promoter is shown in light green shading. Arrow indicates the direction of gene annotations.
- (B) *GDNF* mRNA expression levels in B7<sup>TamS</sup> and G11<sup>TamR</sup> cells. Data are represented as mean  $\pm$  SEM (n=3). \*\* p < 0.005.
- (C) Cell viability of B7<sup>TamS</sup> cells in the presence or absence of 10 ng/ml GDNF and/or 100 mM tamoxifen for 4 days. Data are represented as mean  $\pm$  SEM (n=3). \* p < 0.05, \*\*\* p < 0.0005.
- (D) *GDNF* mRNA expression levels in G11<sup>TamR</sup> scrambled (SCR) and G11<sup>TamR</sup> *GDNF* knockdown (*GDNF*-KD) cells. Data are represented as mean  $\pm$  SEM (n=3). \*\*\*\* p < 0.0001.
- (E) Relative cell number of G11<sup>TamR</sup> scrambled (SCR) and G11<sup>TamR</sup> *GDNF* knockdown (*GDNF*-KD) cells after 4 days without or with 5  $\mu$ M tamoxifen and/or 5 ng/ml GDNF treatment. Data are represented as mean  $\pm$  SEM (n=9). \* p < 0.05.
- (F) Kaplan Meier (KM) plot of relapse free survival (RFS) in a cohort of 88 breast cancer patients with low (black) or high (red) *GDNF* expression.

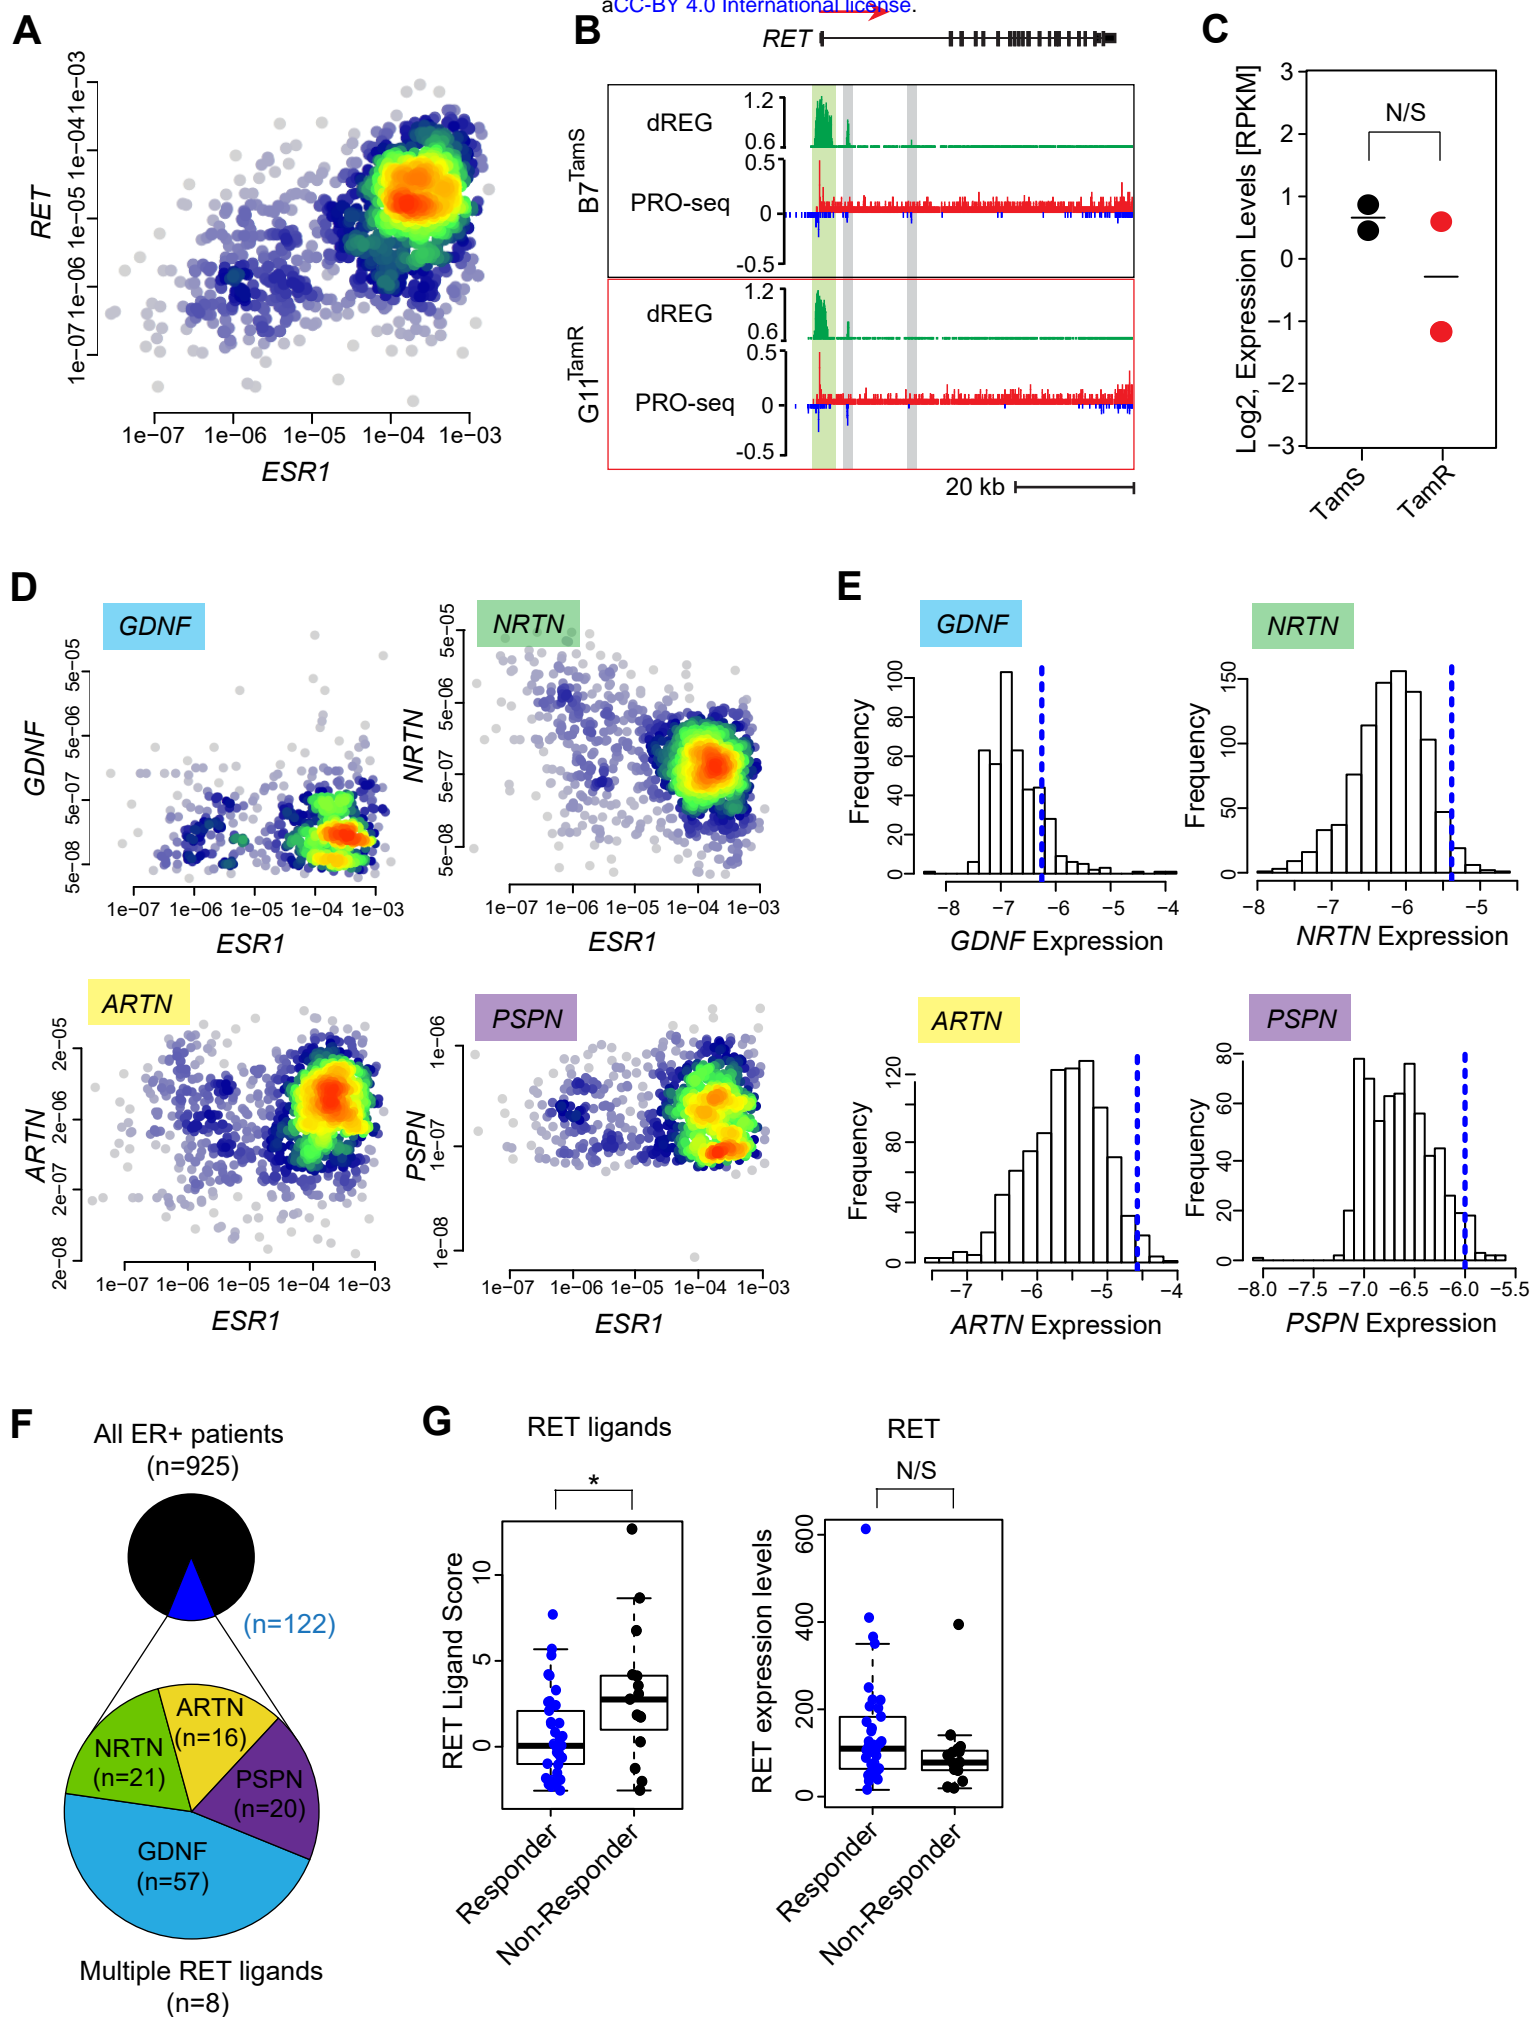

**Figure 4: Expression of RET ligands contributes to endocrine resistance.**

- (A) Density scatterplot showing *RET* and *ESR1* expression in mRNA-seq data from 1,177 primary breast cancer models in the cancer genome atlas (TCGA). Spearman's  $\rho = 0.51$ ,  $p = 1.2e-60$ .
- (B) Transcription near the *RET* locus in B7<sup>TamS</sup> and G11<sup>TamR</sup> cells. PRO-seq densities on sense strand and anti-sense strand are shown in red and blue, respectively. dREG scores are shown in green. Enhancers and promoters are shown in grey and light green shading, respectively. Arrow indicates the directional movement of transcribed genes.
- (C) Dot plot shows *RET* transcription levels in TamS and TamR MCF-7 cells.
- (D) Density scatterplots show the expression of RET ligands (*GDNF*, *NRTN*, *ARTN*, and *PSPN*) versus *ESR1* based on mRNA-seq data from 1,177 primary breast cancers.
- (E) RET ligand expression distribution in ER+ breast cancers. The dotted blue line represents 2.5 times the range between the 25<sup>th</sup> and 50<sup>th</sup> percentile.
- (F) Fraction of ER+ breast cancers ( $n = 925$ ) with at least one RET ligand exceeding the threshold shown in panel E (shown in dark blue,  $n = 122$ ). Among the 4 RET ligands, *GDNF* was the most highly expressed ( $n = 60$ ).
- (G) Boxplots show RET ligands score and RET expression levels in patients that respond or do not respond to aromatase inhibitor letrozole. \*  $p = 0.016$ .



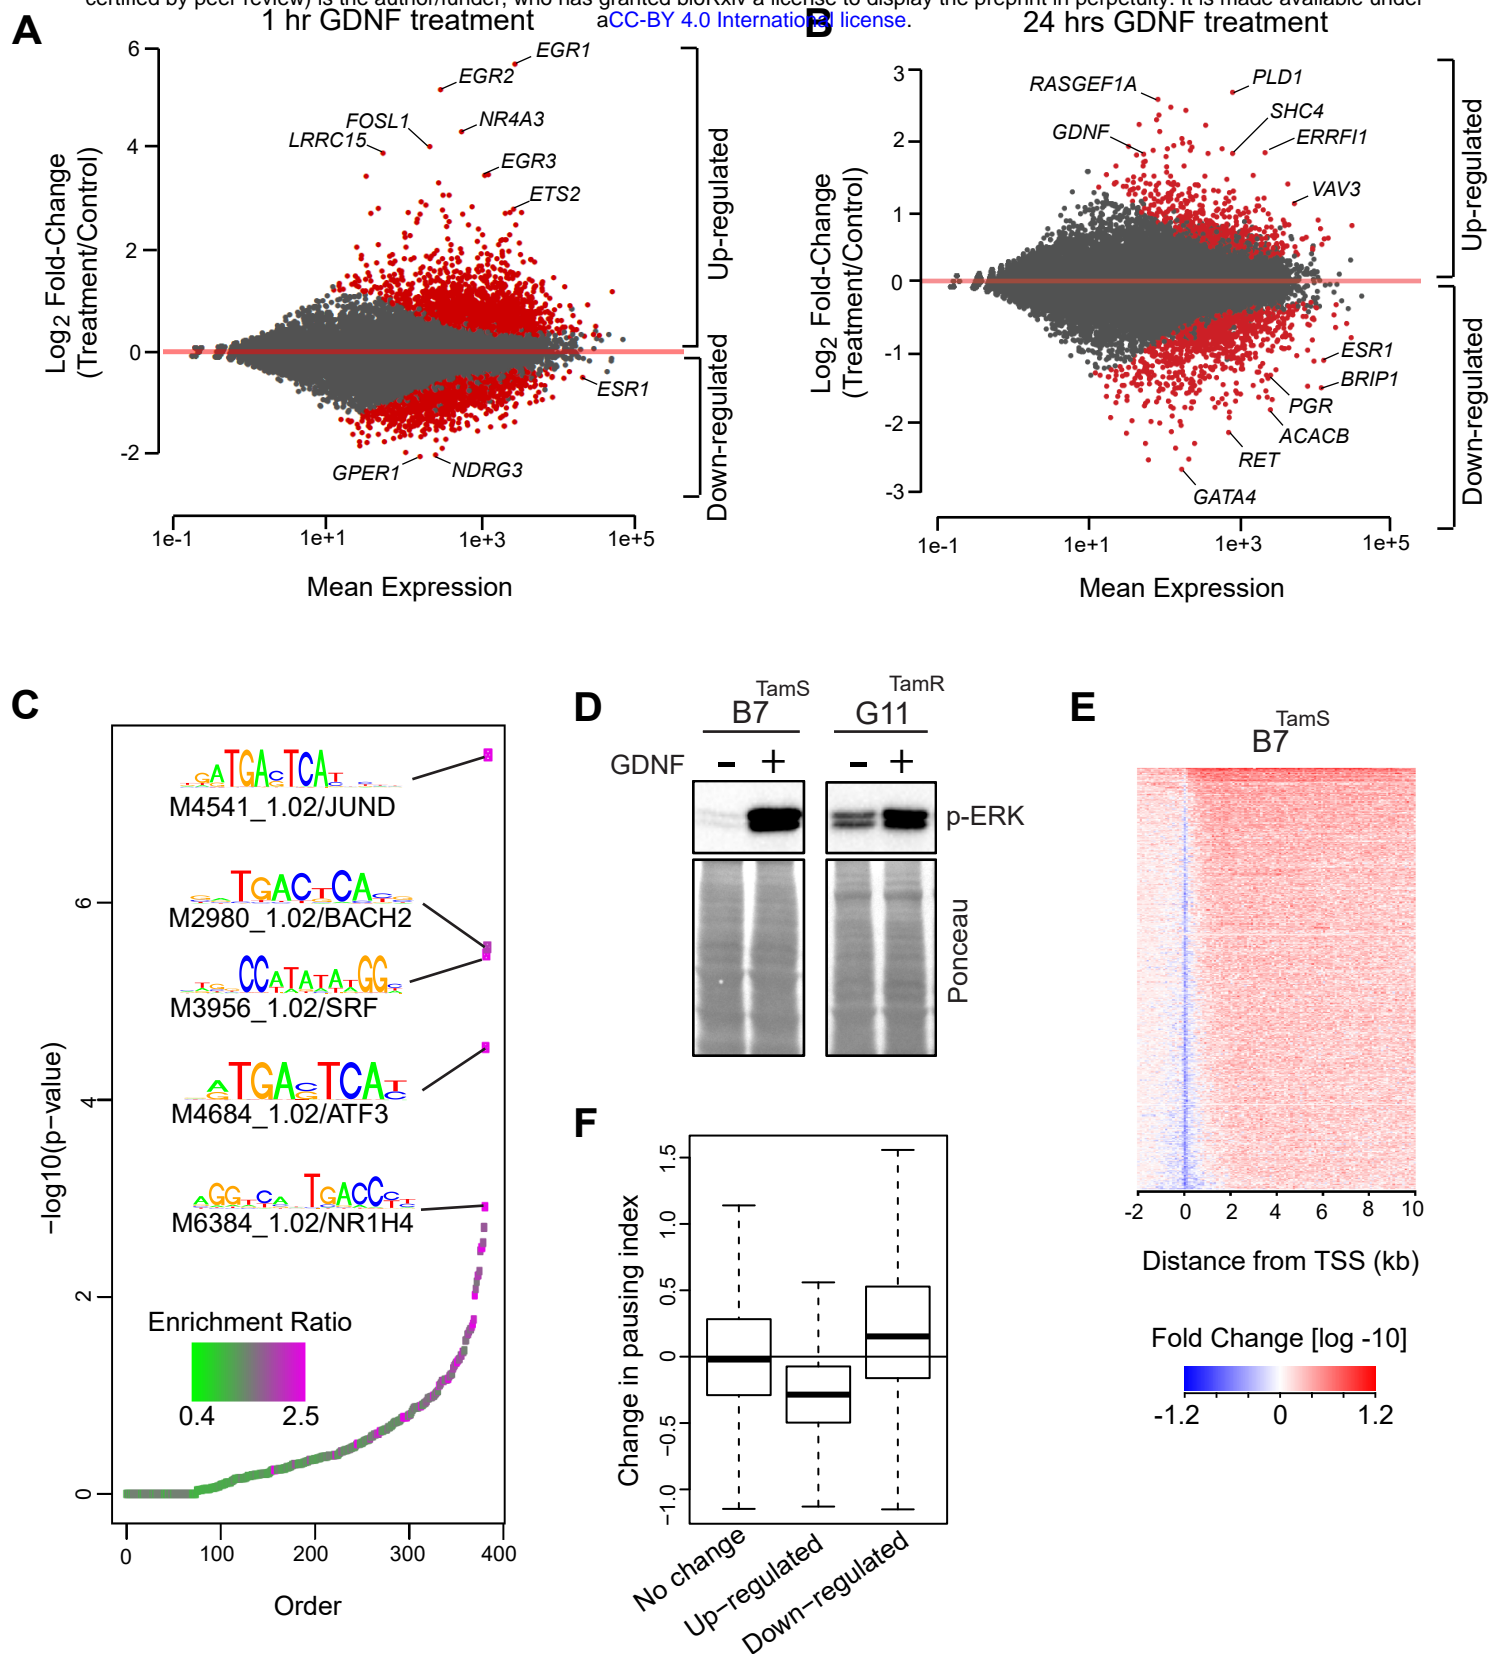

**Figure 5: GDNF activates thousands of target genes at the level of pause release.**

- (A-B) MA plot shows significantly upregulated and downregulated genes (red) following 1 hour (A) or 24 hours (B) of GDNF treatment in TamS MCF-7 cells.
- (C) Motifs enriched in TREs that have different amounts of RNA polymerase following 1 hour of GDNF treatment compared with TREs that have consistent levels.
- (D) Immunoblot analysis of p-ERK in serum deprived B7<sup>TamS</sup> and G11<sup>TamR</sup> cells treatment with 10 ng/mL GDNF.
- (E) Heatmap depicting changes in RNA polymerase density following 1 hour of GDNF treatment in B7<sup>TamS</sup> MCF-7 cells.
- (F) Changes in pausing index between treated (1 hour) and untreated TamS MCF-7 cells at the indicated class of genes.

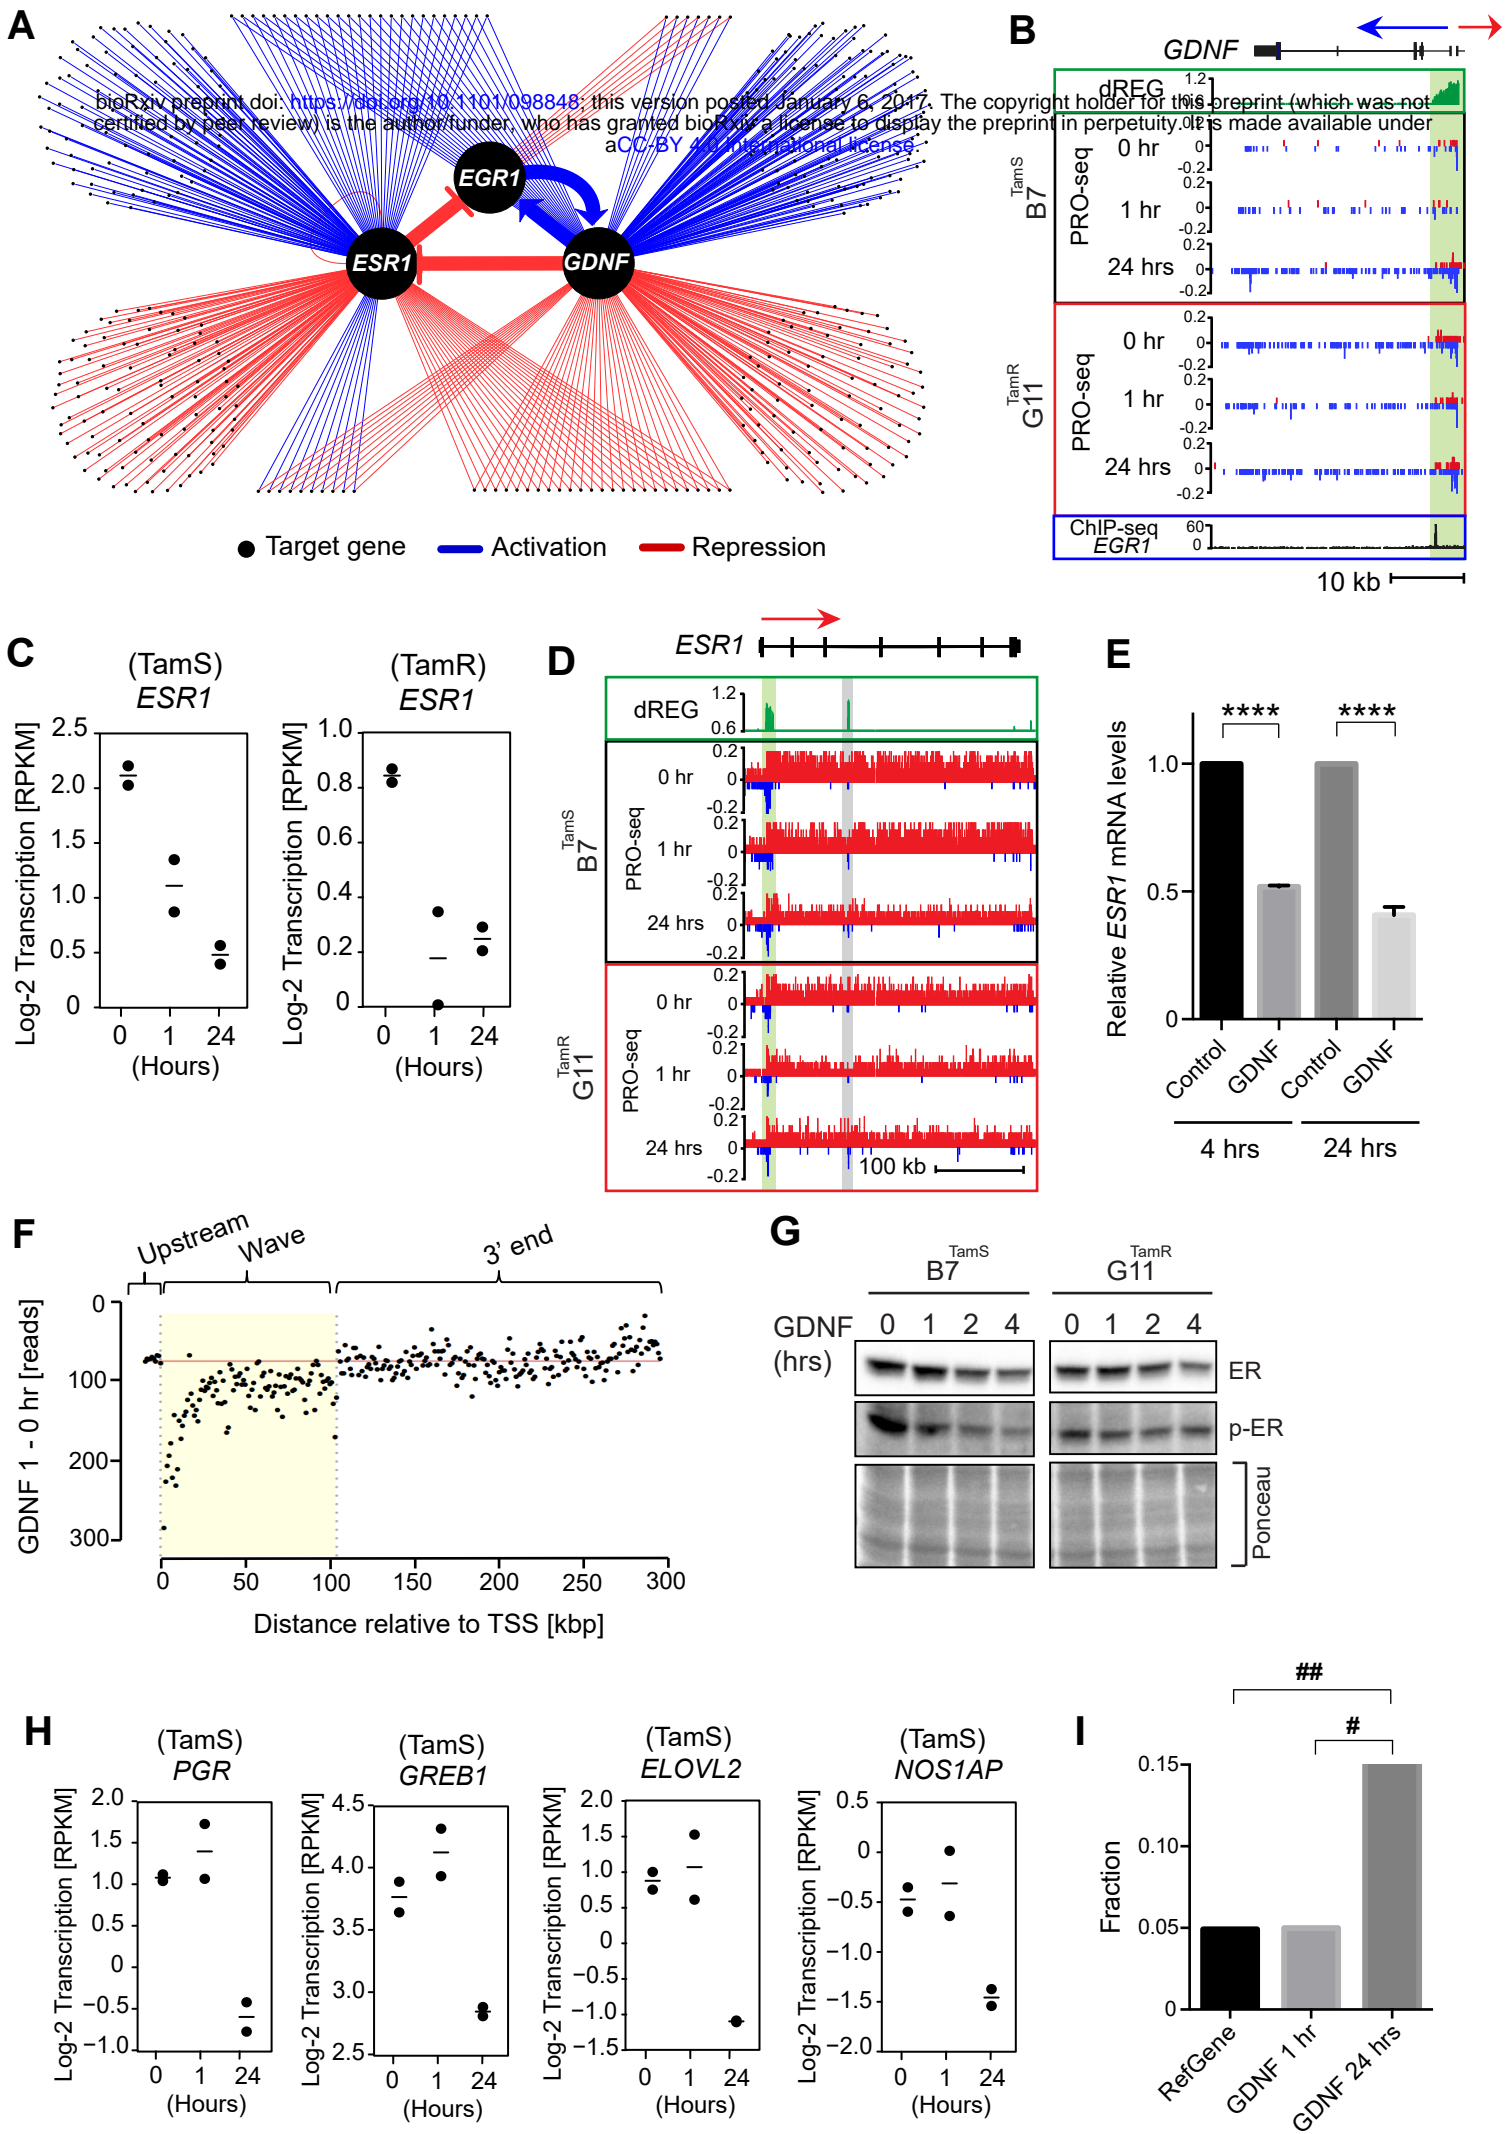

**Figure 6: Bi-stable feedback loop between *ESR1*, *EGR1*, and *GDNF*.**

- (A) Transcriptional regulatory network of GDNF-dependent endocrine resistance highlighting the bi-stable feedback loop inferred between *ESR1*, *EGR1*, and *GDNF*. Each point represents a gene regulated following 1 or 24 hours of GDNF signaling. Only transcription factors or signaling molecules are shown. Blue and red edges represent activation or repression relationships, respectively.
- (B) Transcription near the *GDNF* locus in B7<sup>TamS</sup> and G11<sup>TamR</sup> cells. PRO-seq densities on sense strand and anti-sense strand are shown in red and blue, respectively. dREG scores are shown in green. The promoter is shown in light green shading. Arrows indicate the direction encoding annotated genes.
- (C) Dot plots of transcription levels of *ESR1* in B7<sup>TamS</sup> and G11<sup>TamR</sup> cells following GDNF treatment.
- (D) Transcription in the *ESR1* gene in B7<sup>TamS</sup> and G11<sup>TamR</sup> cells. PRO-seq densities on sense strand and anti-sense strand are shown in red and blue, respectively. dREG scores are shown in green. Enhancers and promoters are shown in grey and light green shading, respectively. Arrow indicates the direction encoding annotated genes.
- (E) *ESR1* mRNA expression levels in B7<sup>TamS</sup> cells following 10 ng/mL GDNF treatment. Data are represented as mean  $\pm$  SEM (n=3). \*\*\*\* p < 0.0001.
- (F) Difference in read counts in 3kb windows along *ESR1* between 1 hours of GDNF and untreated TamS MCF-7 cells. The location of the wave of RNA polymerase along *ESR1* was identified using a hidden Markov model and is represented by the yellow box.
- (G) Immunoblot analysis of ER $\alpha$  and p-ER $\alpha$  in B7<sup>TamS</sup> and G11<sup>TamR</sup> cells treatment with 10 ng/mL for 0, 1, 2, and 4 hours.
- (H) Dot plots representing transcription levels of ER $\alpha$  target genes (*PGR*, *GREB1*, *ELOVL2*, and *NOS1AP*) following a timecourse of GDNF treatment.
- (I) Bar plot showing the fraction of genes whose transcription is up-regulated by 40 min. of E2 in all RefSeq annotated genes (left) or those which are downregulated by 1 (center) or 24 hours (right) of GDNF treatment. E2 target genes were enriched in those down-regulated following 24 hrs of GDNF treatment. The Y axis denotes the fraction of genes that are direct up-regulated E2 targets (defined based on Hah et. al. (2011) and also up-regulated in B7<sup>TamS</sup>). # p = 1.098e-10, ## p = 6.556999e-19. Fisher's exact test was used for statistical analysis.

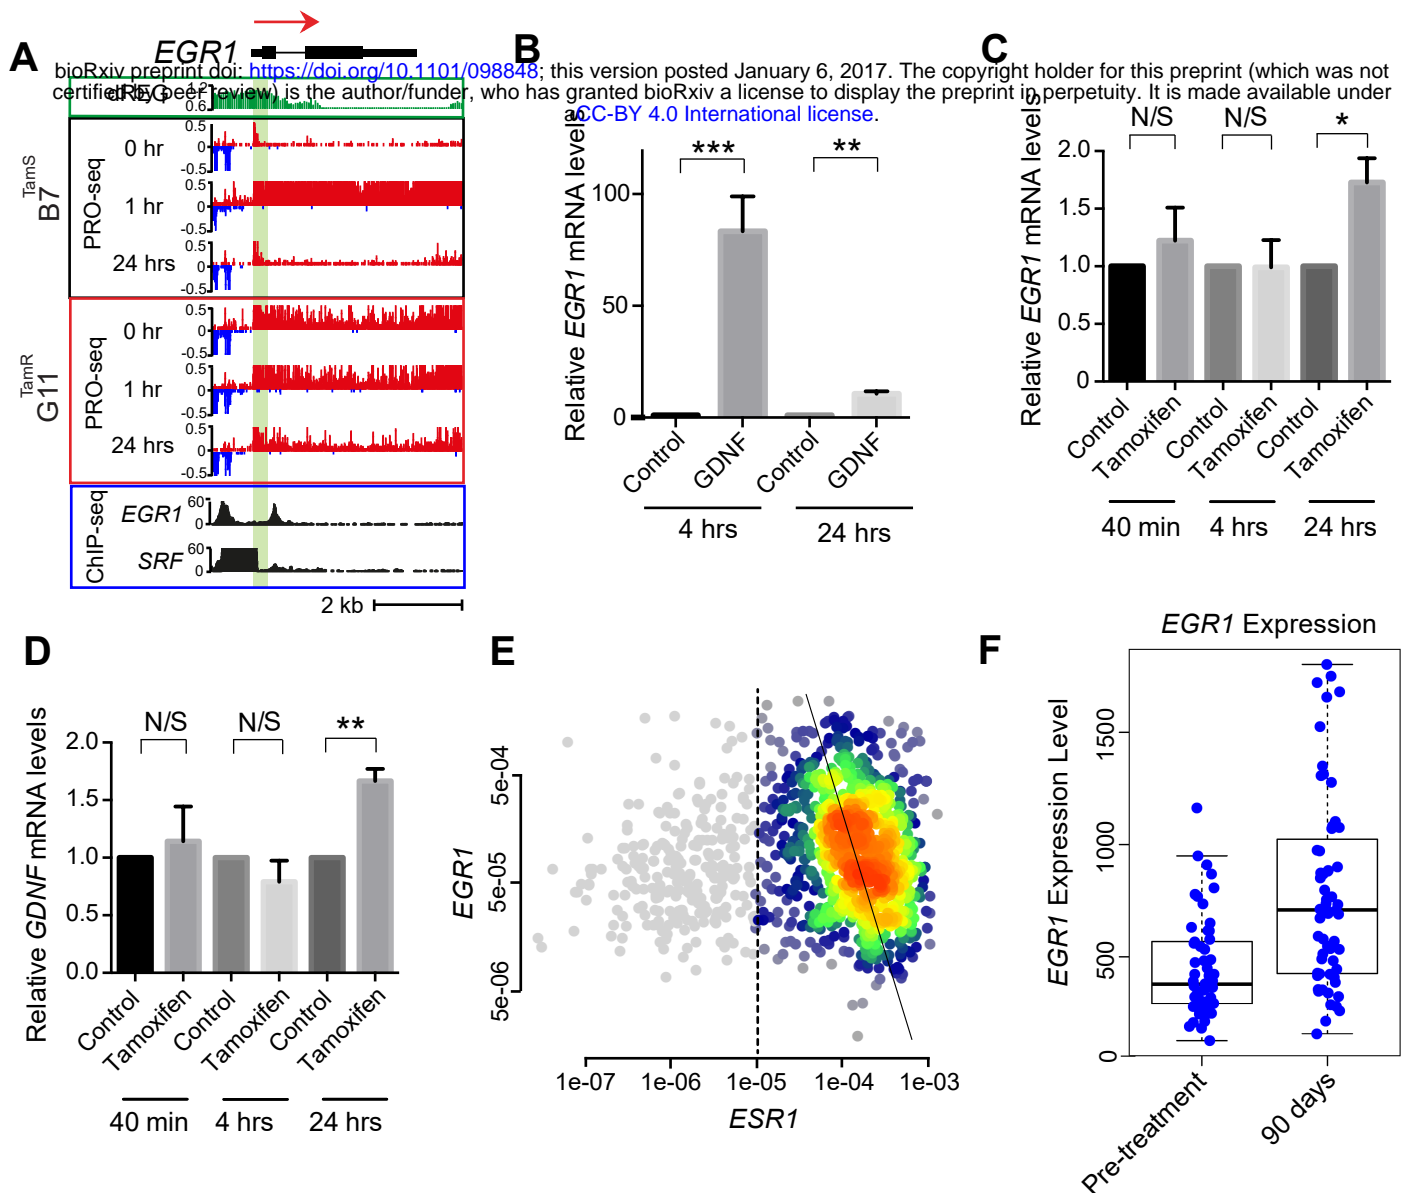

**Figure 7: Validation of bi-stable feedback loop in MCF-7 cells and primary breast tumors**

- (A) Transcription at the *EGR1* locus in B7<sup>TamS</sup> and G11<sup>TamR</sup> cells before and after treatment with GDNF. PRO-seq densities on sense strand and anti-sense strand are shown in red and blue, respectively. dREG scores are shown in green. The number of reads mapping in *EGR1* and SRF ChIP-seq data is shown in black. Arrow indicates the direction of annotated genes.
- (B) *EGR1* mRNA expression level in B7<sup>TamS</sup> cell after treatment with 10 ng/mL GDNF for 4 or 24 hrs. Data are represented as mean  $\pm$  SEM (n=3). \*\* p < 0.01, \*\*\* p  $\leq$  0.001.
- (C) *EGR1* mRNA expression level in G11<sup>TamR</sup> cells after treatment without (DMSO) or with 10 ng/mL GDNF for 4 or 24 hrs. Data are represented as mean  $\pm$  SEM (n=3). \* p < 0.05.
- (D) *GDNF* mRNA expression levels in G11<sup>TamR</sup> cells after treatment without (DMSO) or with 10 ng/mL GDNF for 4 or 24 hrs. Data are represented as mean  $\pm$  SEM (n=3). \*\* p < 0.005.
- (E) Density scatterplots show the expression of *EGR1* versus *ESR1* based on mRNA-seq data from 1,177 primary breast cancers. ER+ breast cancers (n= 925), defined based on *ESR1* expression (>1e-5), are highlighted in color. The trend line was calculated using Deming regression in the ER+ breast cancers (Pearson's R= -0.21; p = 2.7e-10).
- (F) Boxplots show *EGR1* expression level before or following 90 days of treatment with letrozole (p = 1.8e-6, Wilcoxon Rank Sum Test).
